# Supplementary material for: Centenario del Natalicio del Dr. Federico Gómez Santos
Source: publisher site journal article supplement (doi:10.3762/bjoc.9.261), 1997-01-01
Supplement: Additional file 1 [file 1860-5397-9-261-S1.pdf]

# Supporting Information

for

## Synthesis of axially chiral gold complexes and their applications in asymmetric catalyses

Yin-wei Sun<sup>1</sup>, Qin Xu<sup>1\*</sup> and Min Shi<sup>1,2\*</sup>

Address: <sup>1</sup>Key Laboratory for Advanced Materials and Institute of Fine Chemicals, School of Chemistry & Molecular Engineering, East China University of Science and Technology, and 130 MeiLong Road, Shanghai 200237, People's Republic of China, and <sup>2</sup>State Key Laboratory of Organometallic Chemistry, Shanghai Institute of Organic Chemistry, Chinese Academy of Sciences, 354 Fenglin Road, Shanghai 200032, People's Republic of China

Email: Qin Xu - [qinxu@ecust.edu.cn](mailto:qinxu@ecust.edu.cn); Min Shi - [Mshi@mail.sioc.ac.cn](mailto:Mshi@mail.sioc.ac.cn)

\*Corresponding author

### Experimental procedures and characterization data of compounds

#### CONTENTS

|                                                                   |     |
|-------------------------------------------------------------------|-----|
| General remarks.....                                              | S2  |
| The synthesis of NHC–Au(I) complexes.....                         | S2  |
| The synthesis of P–Au(I) complexes.....                           | S23 |
| Typical procedure for intramolecular hydroamination reaction..... | S33 |
| References.....                                                   | S38 |

**General remarks.** Dichloromethane was freshly distilled from calcium hydride; THF and toluene were distilled from sodium (Na) under argon (Ar) atmosphere. Melting points were determined on a digital melting point apparatus and temperatures were uncorrected.  $^1\text{H}$  NMR,  $^{13}\text{C}$  NMR,  $^{19}\text{F}$  NMR and  $^{31}\text{P}$  NMR spectra were recorded on a Bruker AM-400 spectrophotometers. Infrared spectra were recorded on a Perkin-Elmer PE-983 spectrometer with absorption in  $\text{cm}^{-1}$ . Flash column chromatography was performed using 300–400 mesh silica gel. For thin-layer chromatography (TLC), silica gel plates (Huanghai GF<sub>254</sub>) were used. Elementary analysis was taken on a Carlo-Erba 1106 analyzer. Mass spectra were recorded by ESI, and HRMS were measured on a HP-5989 instrument.

## Synthesis of NHC–Au(I) complexes

### Synthesis of (*S*)-2'-(3,5-bis(trifluoromethyl)phenyl)-[1,1'-binaphthalen]-2-ol (**6**)

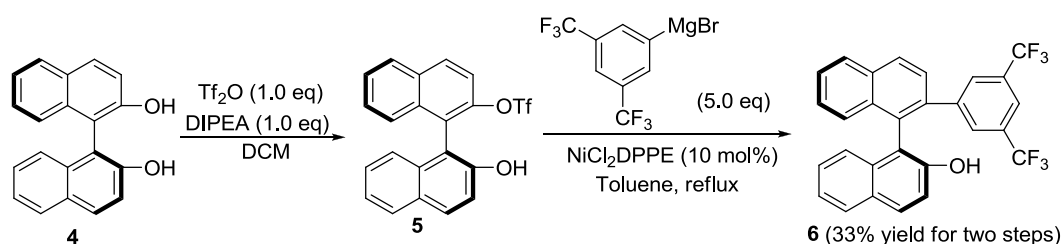

$\text{Tf}_2\text{O}$  (1.18 mL, 10 mmol) was added dropwise into a solution of (*S*)-binaphthol (2.86 g, 10 mmol) and  $i\text{Pr}_2\text{NEt}$  (1.74 mL, 10 mmol) in  $\text{CH}_2\text{Cl}_2$  (50 mL) at 0 °C under argon. The reaction mixture was stirred for 1 h at this temperature and then quenched with saturated  $\text{NaHCO}_3$ . Extractive workup was performed with  $\text{CH}_2\text{Cl}_2$ , and the combined extracts were washed with brine and dried over anhydrous  $\text{Na}_2\text{SO}_4$ . The solvents were evaporated, then dried under vacuum, the crude product and  $\text{NiCl}_2(\text{dppe})$  (530 mg, 1 mmol) was dissolved into THF (40 mL) under argon. To this solution was added dropwise a 1 M THF solution of 3,5-bis(trifluoromethyl)phenyl magnesium bromide (60 mL, 60 mmol) at 0 °C, and stirring was continued under reflux for overnight. The reaction was quenched with saturated  $\text{NH}_4\text{Cl}$  carefully and extractive workup was conducted with EA. The organic extracts were washed with brine and dried over anhydrous  $\text{Na}_2\text{SO}_4$ . Removal of solvents and purification of the residual oil by column

chromatography on silica gel afforded (*S*)-**6** (1.59 g, 3.3 mmol, 33% yield) as yellow powder. This is a known compound.<sup>1</sup> <sup>1</sup>H NMR (400 MHz, CDCl<sub>3</sub>, TMS): δ 8.10 (d, *J* = 8.4 Hz, 1H, ArH), 8.01 (d, *J* = 8.0 Hz, 1H, ArH), 7.77 (t, *J* = 9.2 Hz, 2H, ArH), 7.66 (d, *J* = 8.4 Hz, 1H, ArH), 7.59-7.53 (m, 4H, ArH), 7.45-7.37 (m, 2H, ArH), 7.28-7.19 (m, 2H, ArH), 7.12 (d, *J* = 9.2 Hz, 1H, ArH), 6.98 (d, *J* = 8.4 Hz, 1H, ArH), 4.81 (br, 1H, OH); <sup>19</sup>F NMR (376 MHz, CDCl<sub>3</sub>, CFCl<sub>3</sub>): δ -63.107.

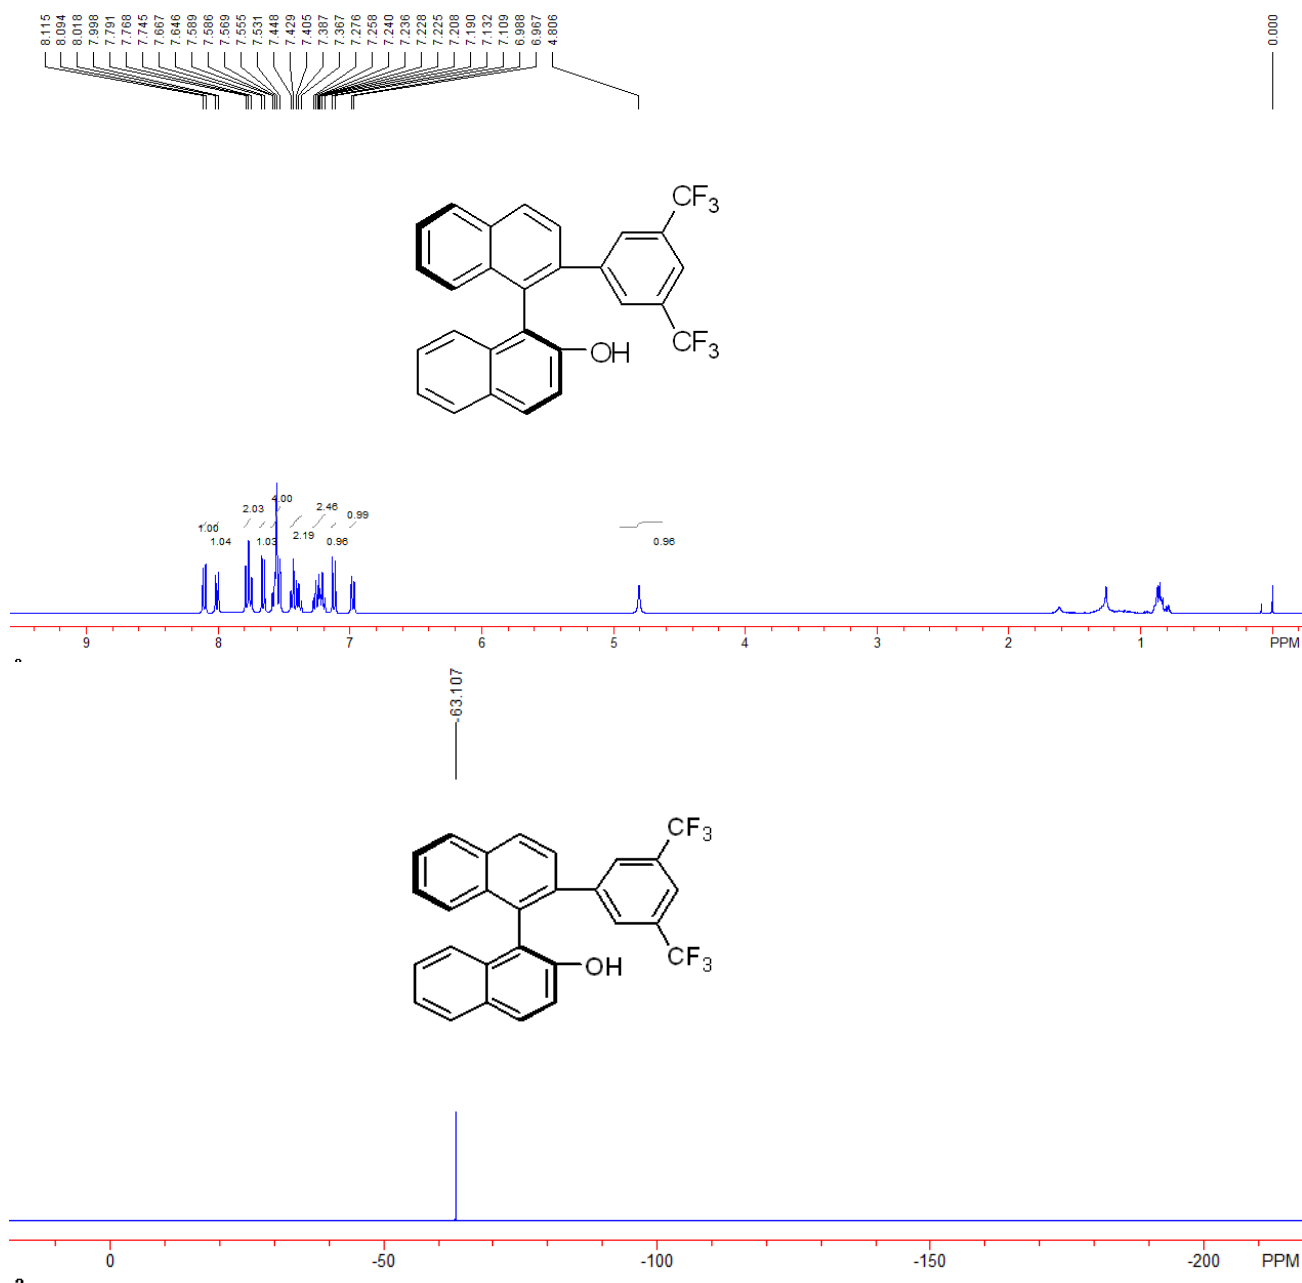

# Synthesis of (S)-2'-(3,5-bis(trifluoromethyl)phenyl)-[1,1'-binaphthalen]-2-yl trifluoromethanesulfonate (7)

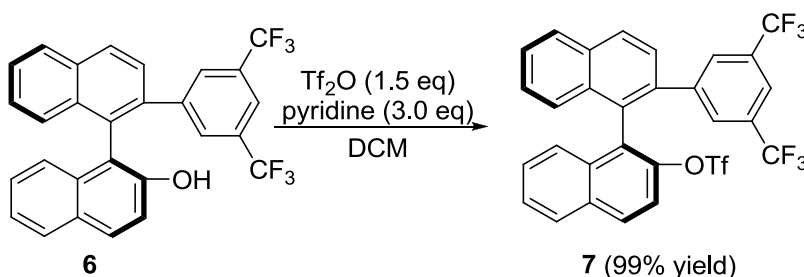

2-hydroxy-1,1'-binaphthyl derivative **6** (1.45 g, 3.0 mmol) was dissolved into dry  $\text{CH}_2\text{Cl}_2$  (12 mL) at 0 °C. Then pyridine (0.7 mL, 9.0 mmol) was added, followed by slow syringe addition of triflic anhydride (1.27 g, 4.5 mmol). The reaction mixture was returned to room temperature slowly. After complete consumption of starting material as monitored by TLC, the solution volume was doubled with  $\text{CH}_2\text{Cl}_2$ . The mixture was washed with 1.0 N HCl, followed by water and saturated  $\text{NaHCO}_3$ . The organic layer was separated and dried over anhydrous sodium sulfate. The solvent was evaporated and dried under vacuum to yield the solid triflate **7** (1.83 g, 99% yield). This is a known compound.<sup>1</sup>  $^1\text{H}$  NMR (400 MHz,  $\text{CDCl}_3$ , TMS):  $\delta$  8.16 (d,  $J = 8.4$  Hz, 1H, ArH), 8.02 (d,  $J = 8.0$  Hz, 1H, ArH), 7.97-7.94 (m, 2H, ArH), 7.67 (d,  $J = 8.8$  Hz, 1H, ArH), 7.60-7.55 (m, 3H, ArH), 7.48-7.44 (m, 3H, ArH), 7.42-7.36 (m, 2H, ArH), 7.30-7.26 (m, 2H, ArH);  $^{19}\text{F}$  NMR (376 MHz,  $\text{CDCl}_3$ ,  $\text{CFCl}_3$ ):  $\delta$  -63.325, -75.020.

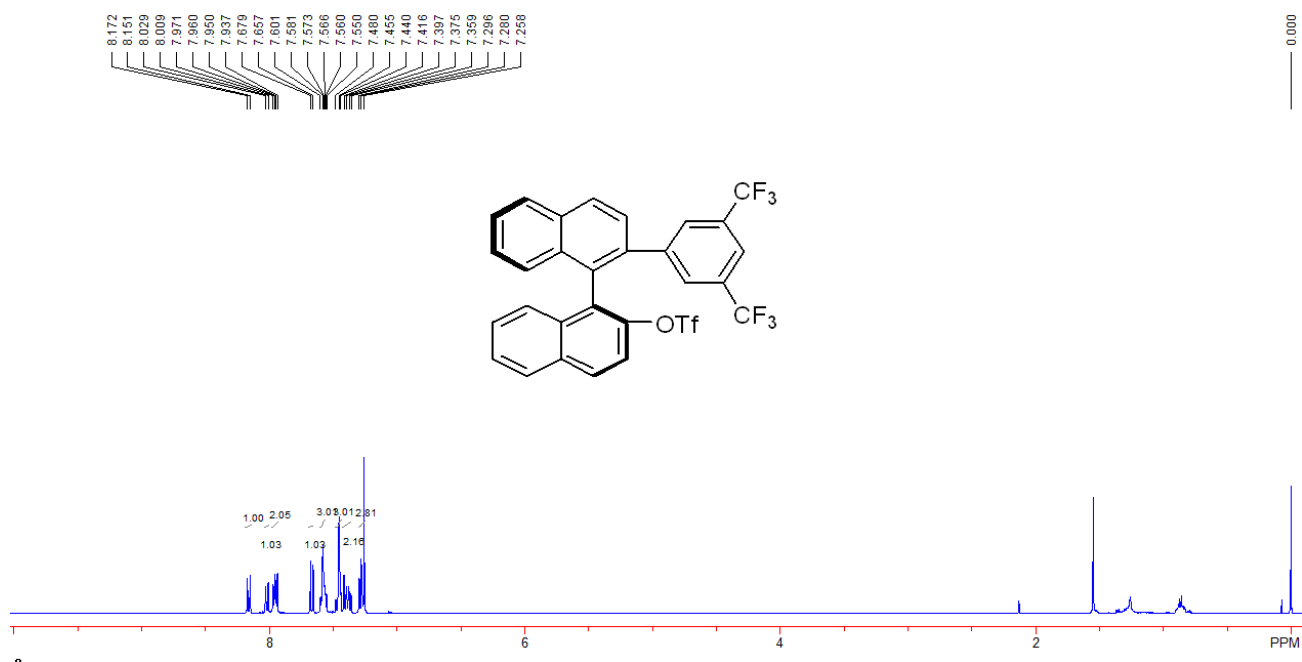

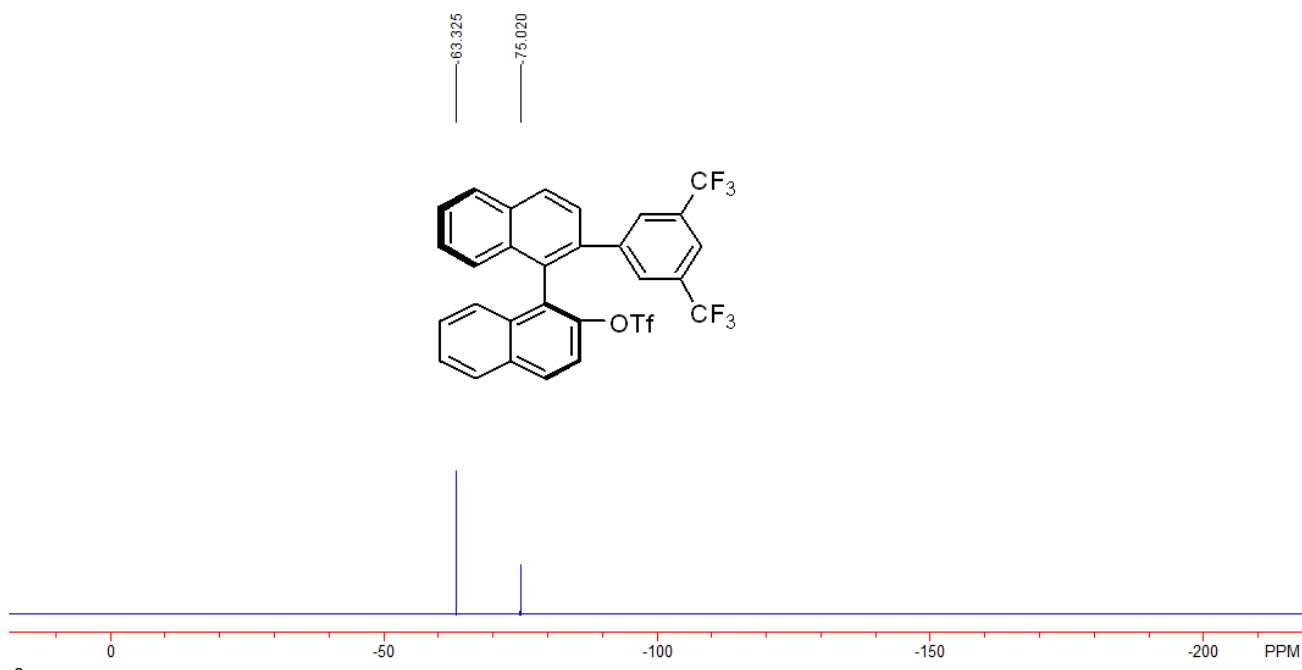

### Synthesis of (*S*)-*N*-benzyl-2'-(3,5-bis(trifluoromethyl)phenyl)-[1,1'-binaphthalen]-2-amine (**8**)

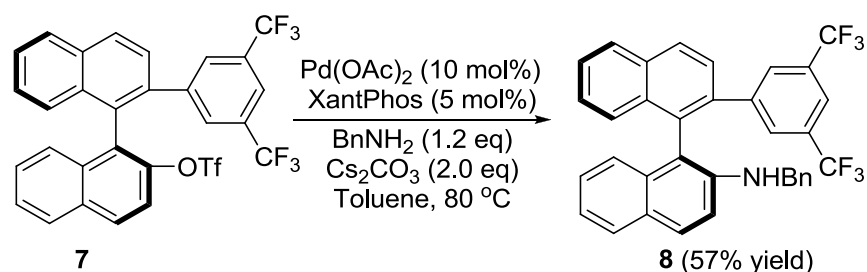

Pd(OAc)<sub>2</sub> (34 mg, 0.15 mmol) and xantphos [4,5-bis(diphenylphosphino)-9,9-dimethylxanthene; 174 mg, 0.3 mmol], freshly prepared triflate (*S*)-**7** (1.83 g, 3 mmol) and Cs<sub>2</sub>CO<sub>3</sub> (1.97 g, 6 mmol), were added to freshly distilled dry toluene (9 mL) in a sealable reaction vessel under argon, and the reaction mixture was stirred at rt. After 5 min, benzylamine (0.4 mL, 3.6 mmol) was added under argon. The mixture was stirred for 3 d at 80 °C. The reaction mixture was then cooled to room temperature, diluted with EA, and filtered through celite. The organic extracts were washed with brine and dried over anhydrous Na<sub>2</sub>SO<sub>4</sub>. The solvent was evaporated to obtain crude product. The pure product (*S*)-**8** (976 mg, 57% yield) was purified by flash chromatography on silica gel using CH<sub>2</sub>Cl<sub>2</sub>/hexanes as the eluent. This is a known compound.<sup>1</sup> <sup>1</sup>H NMR (400 MHz, CDCl<sub>3</sub>, TMS): δ 8.09 (d, *J* = 8.4 Hz, 1H, ArH), 8.00 (d, *J* =

8.4 Hz, 1H, ArH), 7.71-7.65 (m, 5H, ArH), 7.58-7.54 (m, 2H, ArH), 7.47 (d,  $J = 8.0$  Hz, 1H, ArH), 7.40-7.35 (m, 1H, ArH), 7.24-7.10 (m, 5H, ArH), 7.03-7.00 (m, 2H, ArH), 6.95 (d,  $J = 9.2$  Hz, 1H, ArH), 6.85-6.82 (m, 1H, ArH), 4.28 (s, 2H, CH<sub>2</sub>), 3.87 (br, 1H, NH); <sup>19</sup>F NMR (376 MHz, CDCl<sub>3</sub>, CFCl<sub>3</sub>):  $\delta$  -63.020; <sup>13</sup>C NMR (100 MHz, CDCl<sub>3</sub>):  $\delta$  143.7, 143.1, 139.3, 137.6, 134.0, 133.9, 132.8, 132.7, 130.5 (d,  $^2J(\text{C},\text{F}) = 33$  Hz), 129.8, 129.3, 129.03, 129.02, 128.5, 128.3, 128.1, 127.4, 127.3, 127.1, 127.03, 127.02, 126.8, 126.62, 126.58, 123.4, 123.1 (d,  $^1J(\text{C},\text{F}) = 271$  Hz), 121.9, 120.3 (septet,  $^3J(\text{C},\text{F}) = 3.7$  Hz), 114.1, 113.5, 47.8.

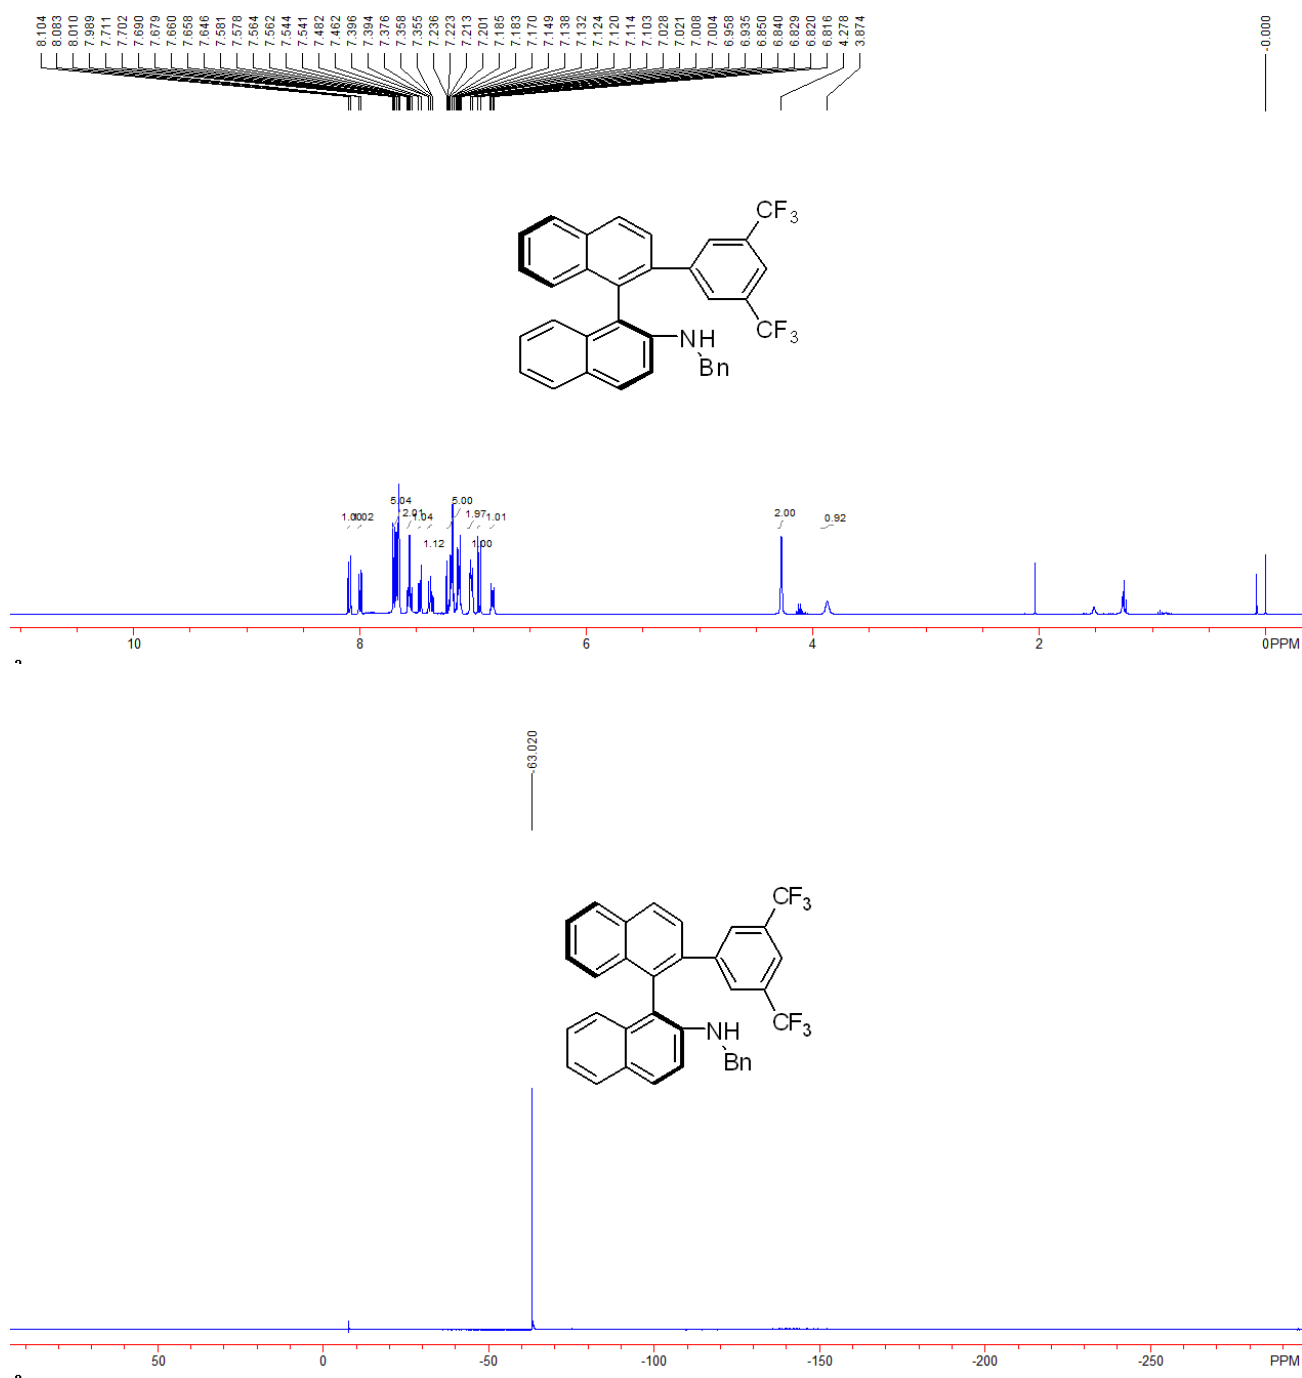

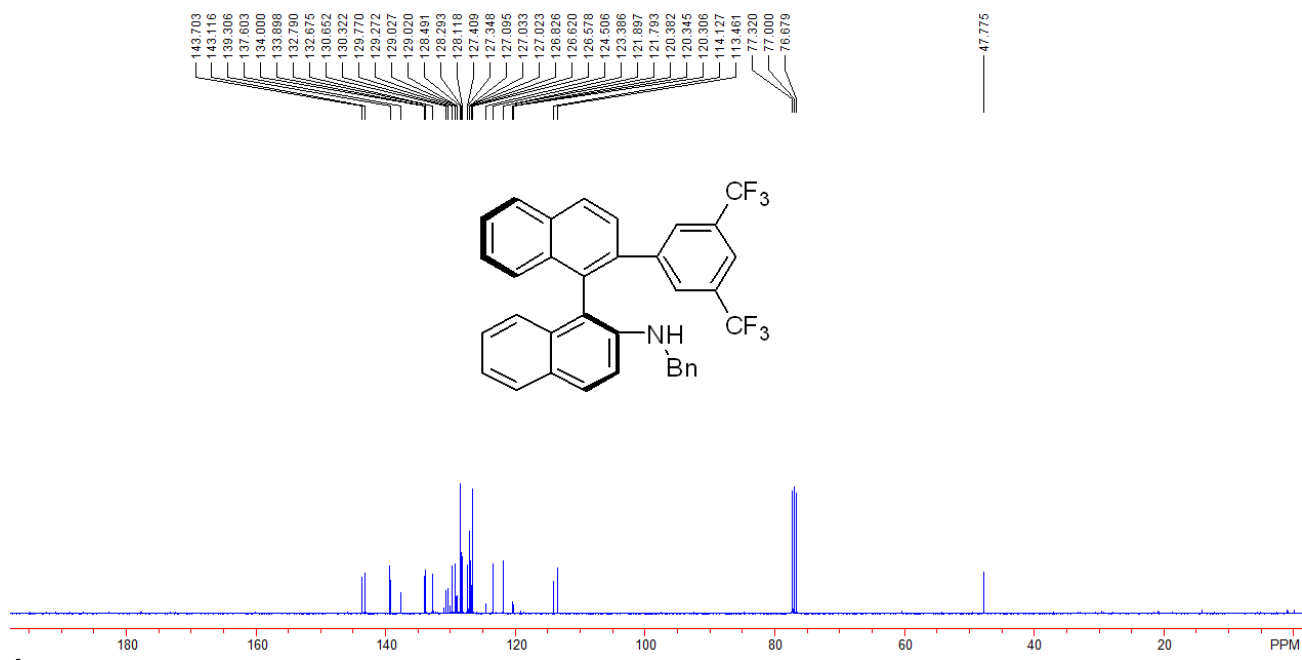

### Synthesis of (S)-2'-((3,5-bis(trifluoromethyl)phenyl)-[1,1'-binaphthalen]-2-yl)amine (9)

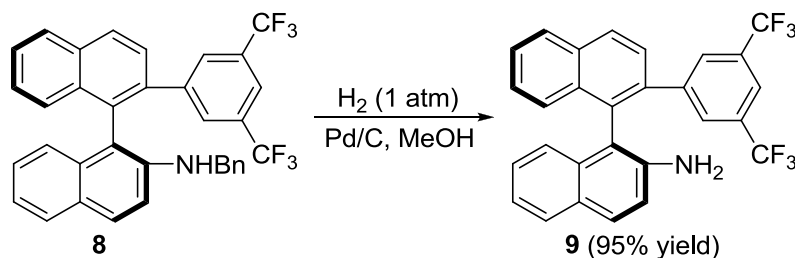

A solution of 2-benzylamino-1,1'-binaphthyl derivative (*S*)-**8** (856 mg, 1.5 mmol) was dissolved in MeOH (12 mL) in an oven-dried two-neck flask equipped with a argon supply. Under argon, 5% Pd/C (86 mg) was added. The argon atmosphere was then removed under vacuum, and the apparatus was placed under 1 atm of H<sub>2</sub> (hydrogen balloon). The mixture was stirred for overnight under reflux, until complete consumption of starting material was indicated by TLC. The hydrogen atmosphere was then removed under vacuum, and the reaction mixture was flushed generously with nitrogen. The suspended Pd/C was removed by filtration through celite, and the solvent was evaporated to obtain the solid product (*S*)-**9** (685 mg, 95% yield). They are indefinitely stable if stored in an argon atmosphere. This is a known compound.<sup>1</sup> <sup>1</sup>H NMR (400 MHz, CDCl<sub>3</sub>, TMS): δ 8.09 (d, *J* = 8.8 Hz, 1H, ArH), 8.00 (d, *J* = 8.0 Hz, 1H, ArH), 7.70-7.65 (m, 5H, ArH), 7.55 (t, *J* = 8.0 Hz, 1H, ArH), 7.52 (s, 1H, ArH), 7.47 (d, *J* =

8.4 Hz, 1H, ArH), 7.39-7.35 (m, 1H, ArH), 7.15-7.10 (m, 2H, ArH), 6.94 (d,  $J = 8.8$  Hz, 1H, ArH), 6.84-6.82 (m, 1H, ArH), 3.58 (br, 2H, NH);  $^{19}\text{F}$  NMR (376 MHz,  $\text{CDCl}_3$ ,  $\text{CFCl}_3$ ):  $\delta$  -63.470;  $^{13}\text{C}$  NMR (100 MHz,  $\text{CDCl}_3$ ):  $\delta$  143.1, 142.4, 137.5, 133.83, 133.77, 132.7, 132.5, 130.4 (d,  $^2J(\text{C},\text{F}) = 33$  Hz), 129.6, 129.1, 129.0, 128.3, 128.0, 127.7, 127.4, 127.3, 126.9, 126.7, 126.4, 123.5, 123.1 (d,  $^1J(\text{C},\text{F}) = 271$  Hz), 122.2, 120.3, 117.4, 114.4.

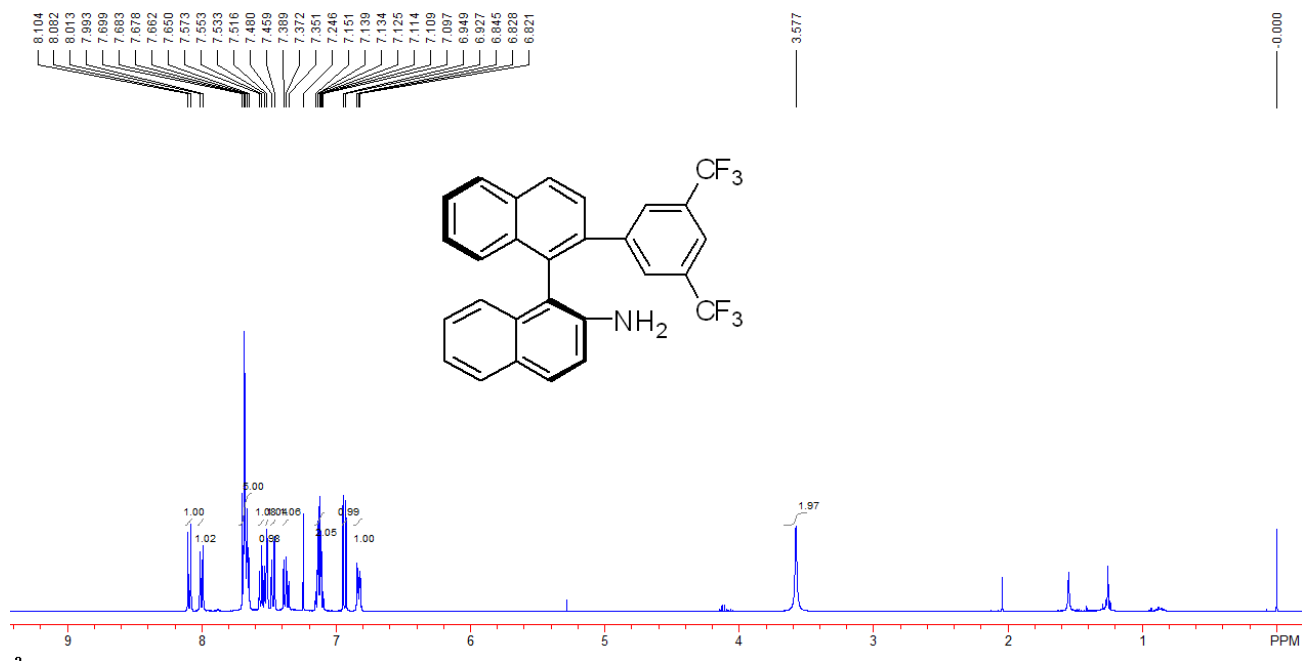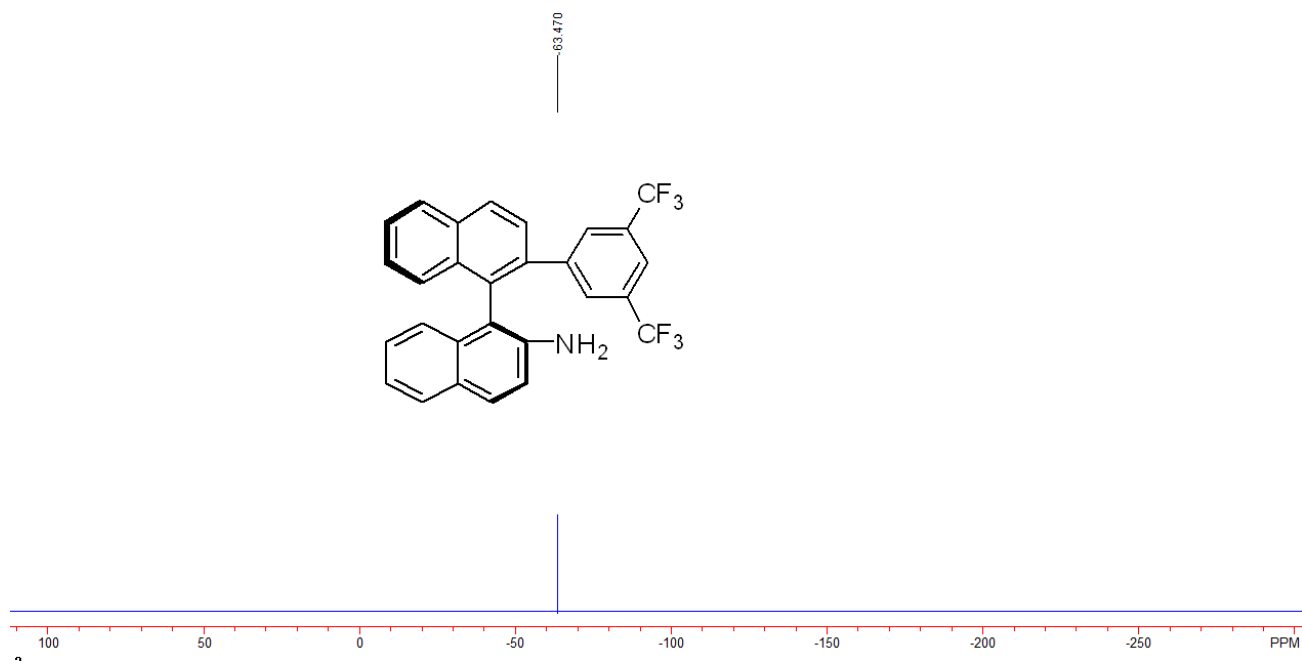



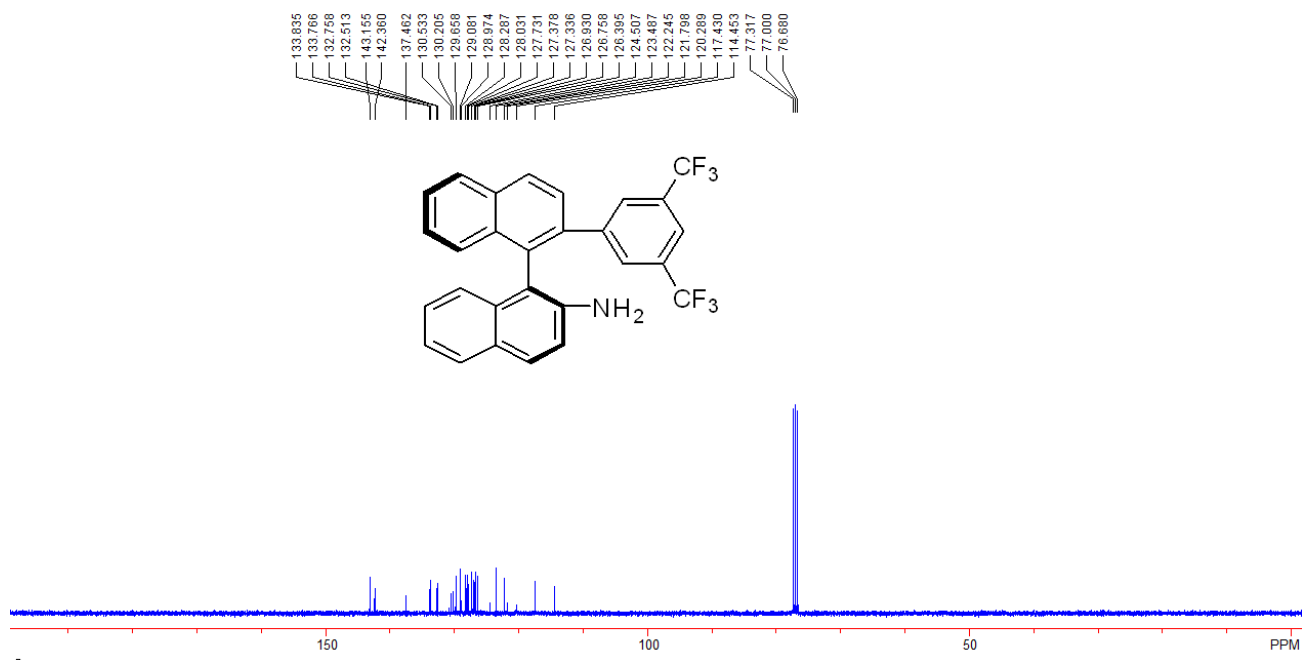

### Synthesis of *(S)*-2'-(3,5-bis(trifluoromethyl)phenyl)-*N*-(2-nitrophenyl)-[1,1'-binaphthalen]-2-amine

(10)

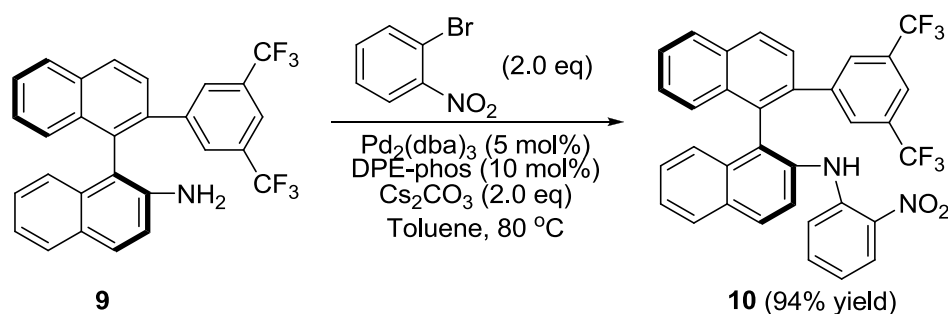

A mixture of 2-amino-1,1'-binaphthyl derivative (*S*)-**9** (673 mg, 1.4 mmol), 1-bromo-2-nitrobenzene (563 mg, 2.8 mmol), Pd<sub>2</sub>(dba)<sub>3</sub> (64 mg, 0.07 mmol), DPE-phos (77 mg, 0.14 mmol) and Cs<sub>2</sub>CO<sub>3</sub> (913 mg, 2.8 mmol) was dissolved into toluene (6.0 mL) under argon. The mixture was stirred at 80 °C for 3 d. The reaction mixture was then cooled to room temperature, diluted with EA, and filtered through celite. The organic extracts were washed with brine and dried over anhydrous Na<sub>2</sub>SO<sub>4</sub>. The solvent was evaporated to obtain crude product. The pure product (*S*)-**10** (792 mg, 94% yield) was purified by flash chromatography on silica gel using PE/EA as the eluent. This is a new compound.  $[\alpha]_D^{20}$  26.7 (*c* 0.25, CH<sub>2</sub>Cl<sub>2</sub>); <sup>1</sup>H NMR (400 MHz, CDCl<sub>3</sub>, TMS): δ 8.83 (s, 1H, NH), 8.11 (d, *J* = 8.8 Hz, 1H, ArH), 8.02 (d,



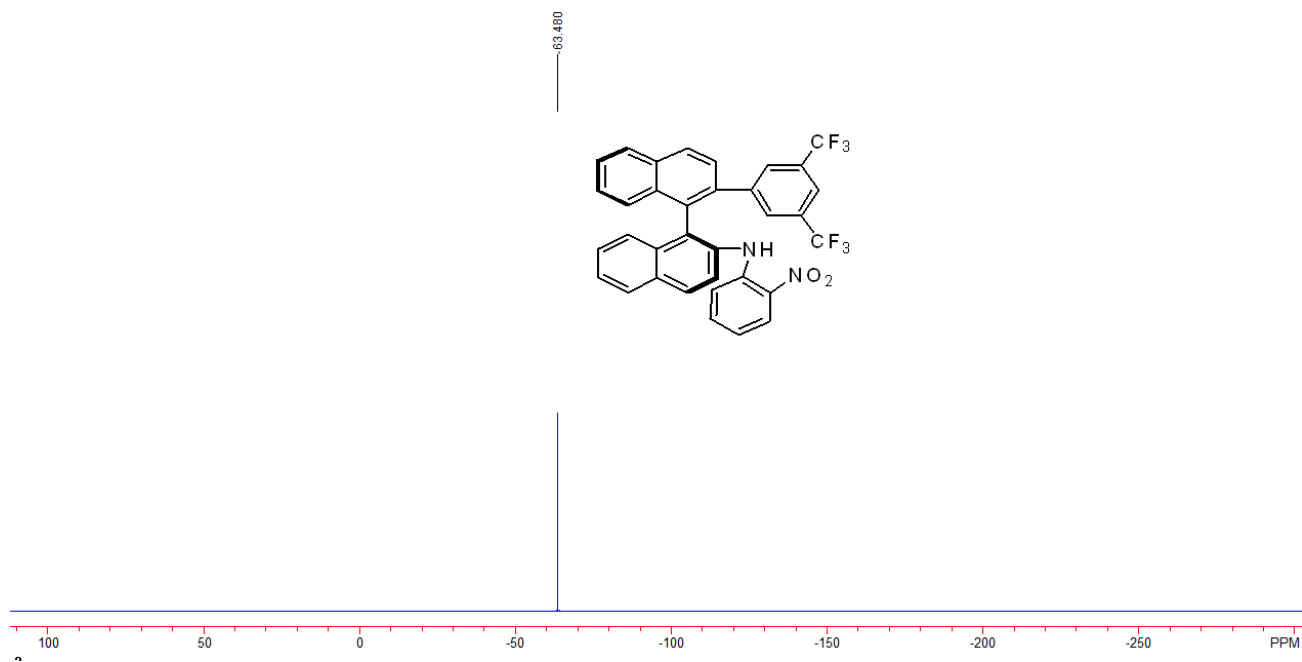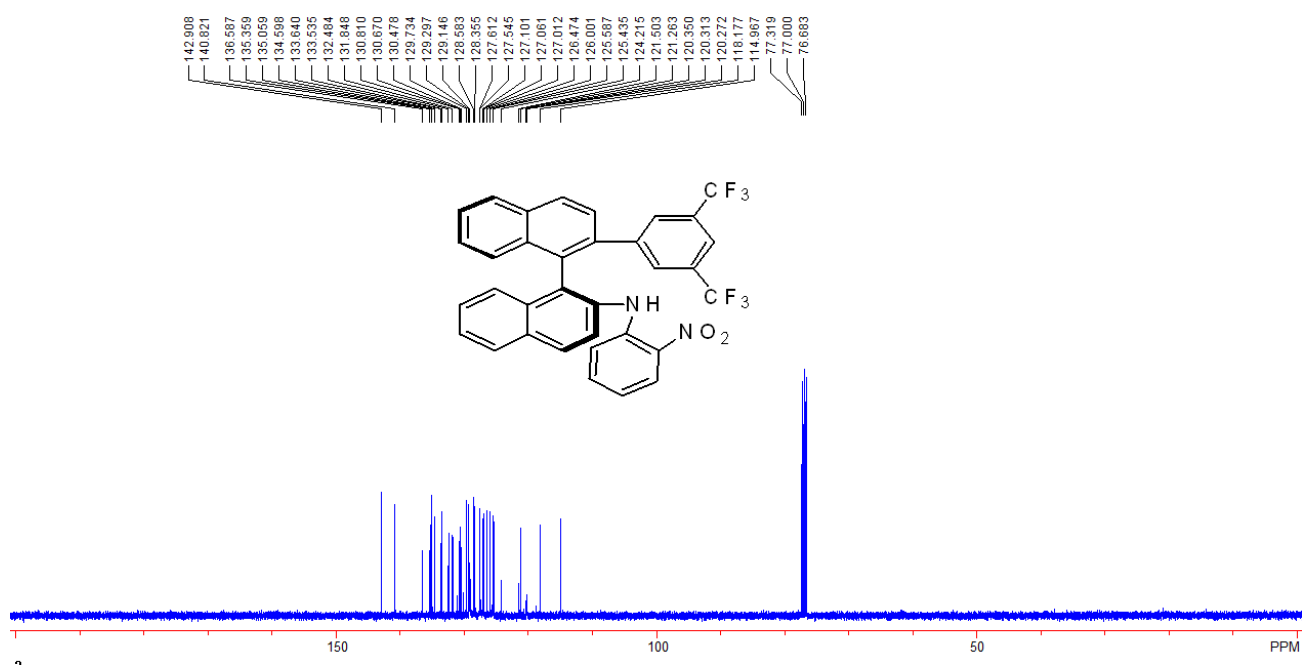

Synthesis of (*S*)-*N*<sup>1</sup>-(2'-(3,5-bis(trifluoromethyl)phenyl)-[1,1'-binaphthalen]-2-yl)benzene-1,2-diamine (**11**)

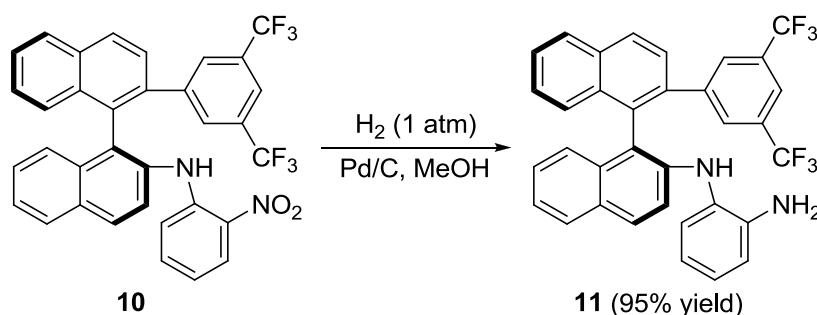

A mixture of 1,1'-binaphthyl derivative (*S*)-**10** (782 mg, 1.3 mol) and 10% Pd/C (78 mg) was dissolved into MeOH (6 mL) under argon. The argon atmosphere was then removed under vacuum, and the apparatus was placed under 1 atm of H<sub>2</sub> (hydrogen balloon). The mixture was stirred for overnight under reflux, until complete consumption of starting material was indicated by TLC. The hydrogen atmosphere was then removed under vacuum. The suspended Pd/C was removed by filtration through celite. The solvent was evaporated to obtain crude product (*S*)-**11** (706 mg, 95% yield). This is a new compound. <sup>1</sup>H NMR (400 MHz, CDCl<sub>3</sub>, TMS): δ 8.11 (d, *J* = 8.0 Hz, 1H, ArH), 8.01 (d, *J* = 8.0 Hz, 1H, ArH), 7.73-7.66 (m, 5H, ArH), 7.59-7.54 (m, 3H, ArH), 7.42-7.38 (m, 1H, ArH), 7.22-7.18 (m, 2H, ArH), 7.01-6.97 (m, 1H, ArH), 6.96-6.91 (m, 1H, ArH), 6.89 (d, *J* = 9.2 Hz, 1H, ArH), 6.65-6.58 (m, 3H, ArH), 4.71 (s, 1H, NH), 3.42 (br, 2H, NH<sub>2</sub>); <sup>19</sup>F NMR (376 MHz, CDCl<sub>3</sub>, CFC<sub>3</sub>): δ -63.382; <sup>13</sup>C NMR (100 MHz, CDCl<sub>3</sub>): δ 143.1, 142.7, 141.7, 137.6, 134.3, 133.9, 132.8, 132.4, 130.6 (d, <sup>2</sup>*J*(C,F) = 33 Hz), 129.6, 129.5, 129.1, 128.5, 128.2, 128.0, 127.5, 127.4, 127.3, 127.1, 127.0, 126.5, 126.2, 126.1, 123.8, 123.0 (d, <sup>1</sup>*J*(C,F) = 271 Hz), 122.6, 121.7, 120.4 (septet, <sup>3</sup>*J*(C,F) = 3.6 Hz), 118.9, 115.73, 115.71, 115.69. IR (CH<sub>2</sub>Cl<sub>2</sub>): ν 3482, 3381, 3057, 2927, 1620, 1385, 1277, 1178, 1129, 813, 739, 708, 681 cm<sup>-1</sup>. MS (*m/z*): HRMS (ESI) Calcd. for C<sub>34</sub>H<sub>22</sub>F<sub>6</sub>N<sub>2</sub> ([M+H]<sup>+</sup>); 572.1687. Found: 572.1690.

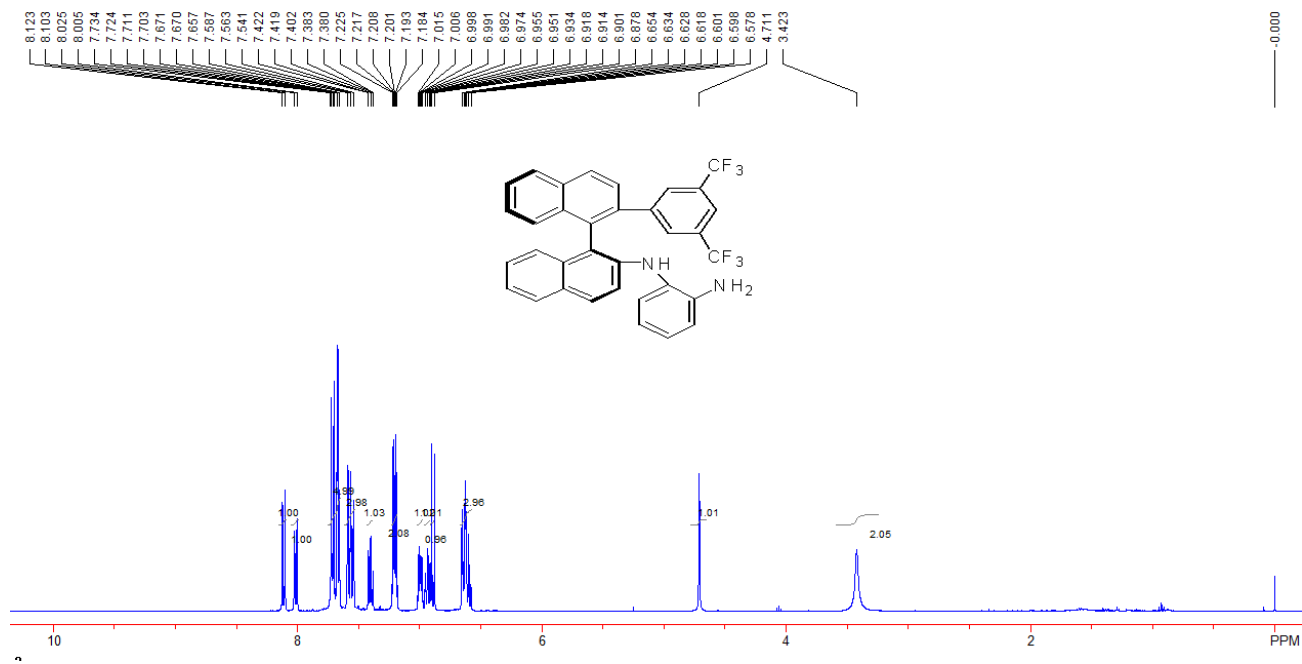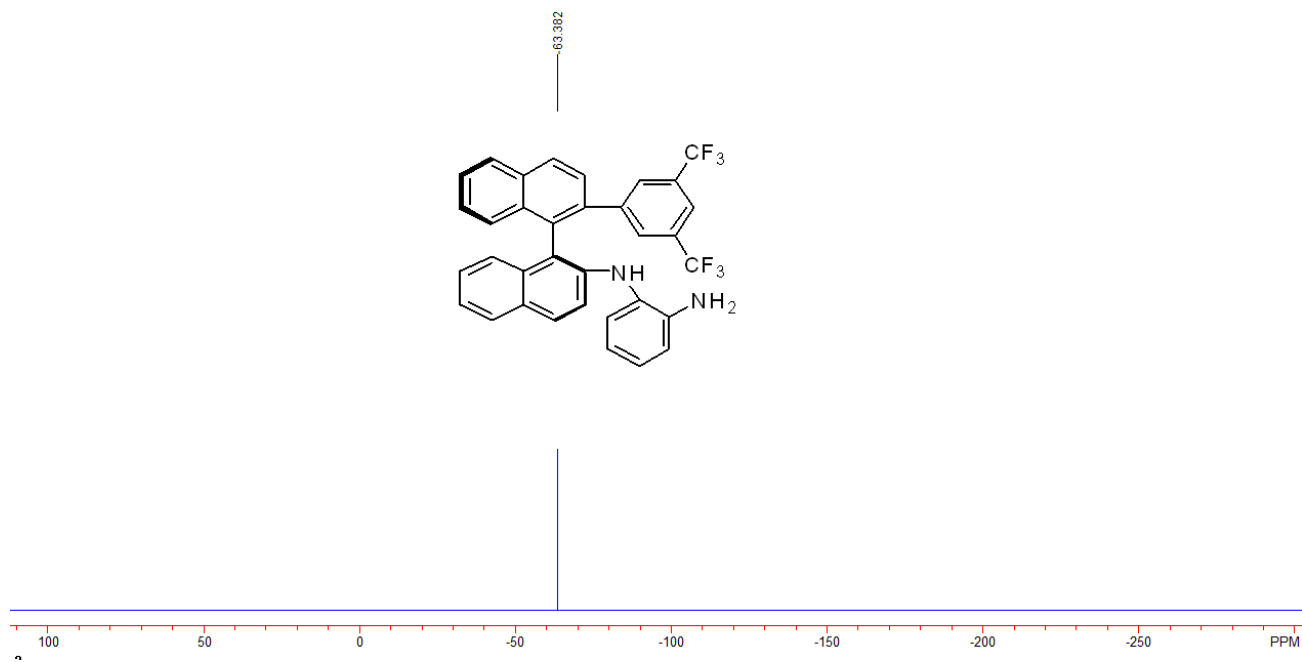

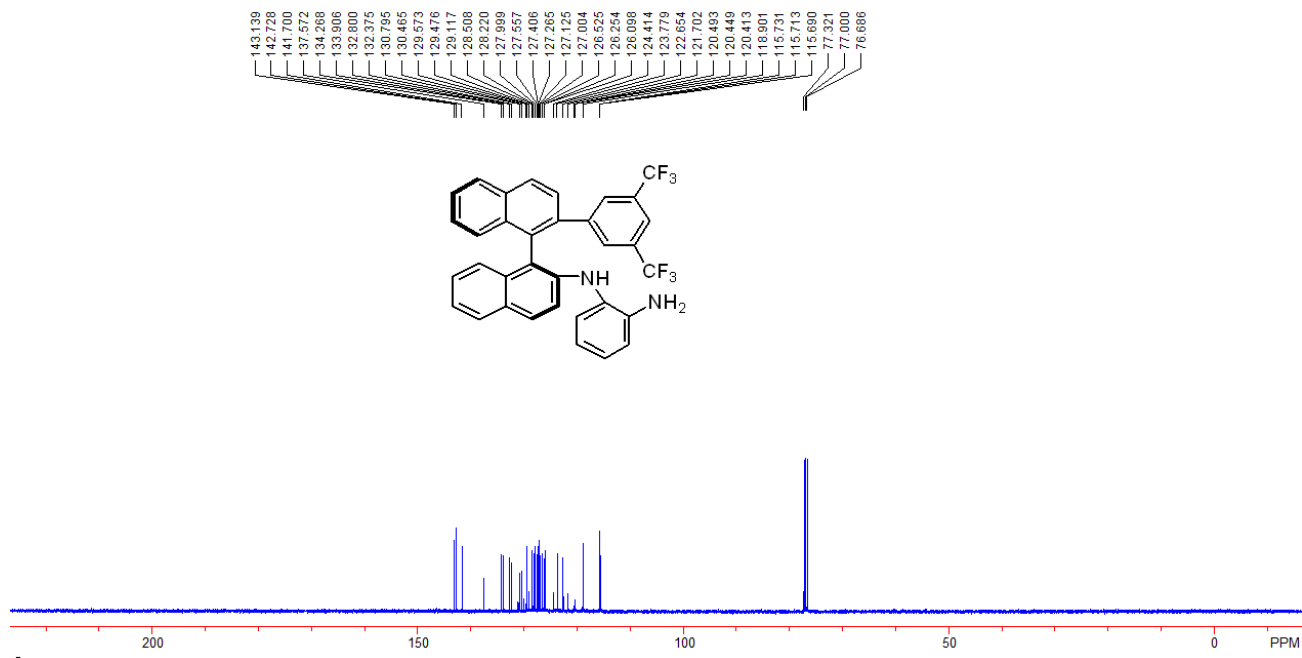

### Synthesis of (*S*)-1-(2'-(3,5-bis(trifluoromethyl)phenyl)-[1,1'-binaphthalen]-2-yl)-1*H*-benzo[d]imidazole (**12**)

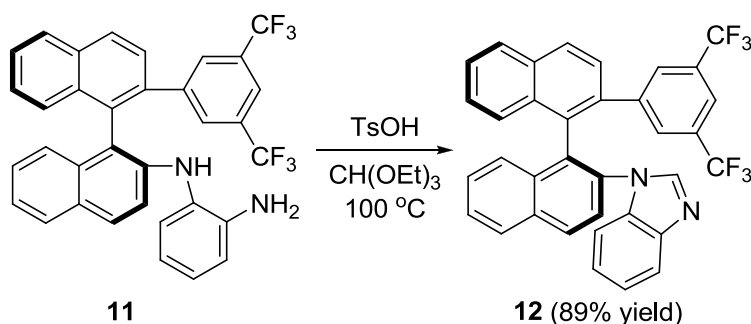

To a solution of 1,1'-binaphthyl derivative (*S*)-**11** (686 mg, 1.2 mmol) in  $\text{HC}(\text{OEt})_3$  (11 mL) under argon a catalytic amount of TsOH was added. The mixture was stirred for overnight at 100 °C. Until complete consumption of starting material was indicated by TLC, the solvent was evaporated to obtain crude product. The (*S*)-**12** (621 mg, 89% yield) was purified by flash chromatography on silica gel using PE/EA as the eluent. This is a new compound.  $[\alpha]_D^{20}$  -42.8 (*c* 0.05,  $\text{CH}_2\text{Cl}_2$ );  $^1\text{H}$  NMR (400 MHz,  $\text{CDCl}_3$ , TMS):  $\delta$  8.10 (t,  $J$  = 8.4 Hz, 2H, ArH), 8.02 (d,  $J$  = 8.4 Hz, 2H, ArH), 7.67-7.59 (m, 3H, ArH), 7.53-7.44 (m, 6H, ArH), 7.38 (d,  $J$  = 8.4 Hz, 1H, ArH), 7.19-7.15 (m, 1H, ArH), 6.97-6.93 (m, 2H, ArH), 6.80 (s, 2H, ArH), 6.32 (d,  $J$  = 8.0 Hz, 1H, ArH);  $^{19}\text{F}$  NMR (376 MHz,  $\text{CDCl}_3$ ,  $\text{CFC}_l_3$ ):  $\delta$  -63.128;

$^{13}\text{C}$  NMR (100 MHz,  $\text{CDCl}_3$ ):  $\delta$  142.5, 142.0, 141.9, 135.8, 135.0, 133.9, 133.2, 133.1, 132.4, 132.3, 131.2, 130.76, 130.71 (d,  $^2J(\text{C},\text{F}) = 33$  Hz), 130.3, 130.0, 128.8, 128.7, 128.4, 128.3, 128.0, 127.3, 127.1, 127.0, 126.8, 126.5, 123.7, 123.6, 122.65, 122.62 (d,  $^1J(\text{C},\text{F}) = 271$  Hz), 120.4, 120.0, 108.6. IR ( $\text{CH}_2\text{Cl}_2$ ):  $\nu$  2917, 2849, 1490, 1455, 1386, 1278, 1264, 1183, 1135, 820, 799, 737, 707  $\text{cm}^{-1}$ ; MS ( $m/z$ ): HRMS (ESI) Calcd. for  $\text{C}_{35}\text{H}_{21}\text{F}_6\text{N}_2$  ( $[\text{M}+\text{H}]^+$ ); 583.1603. Found: 583.1600.

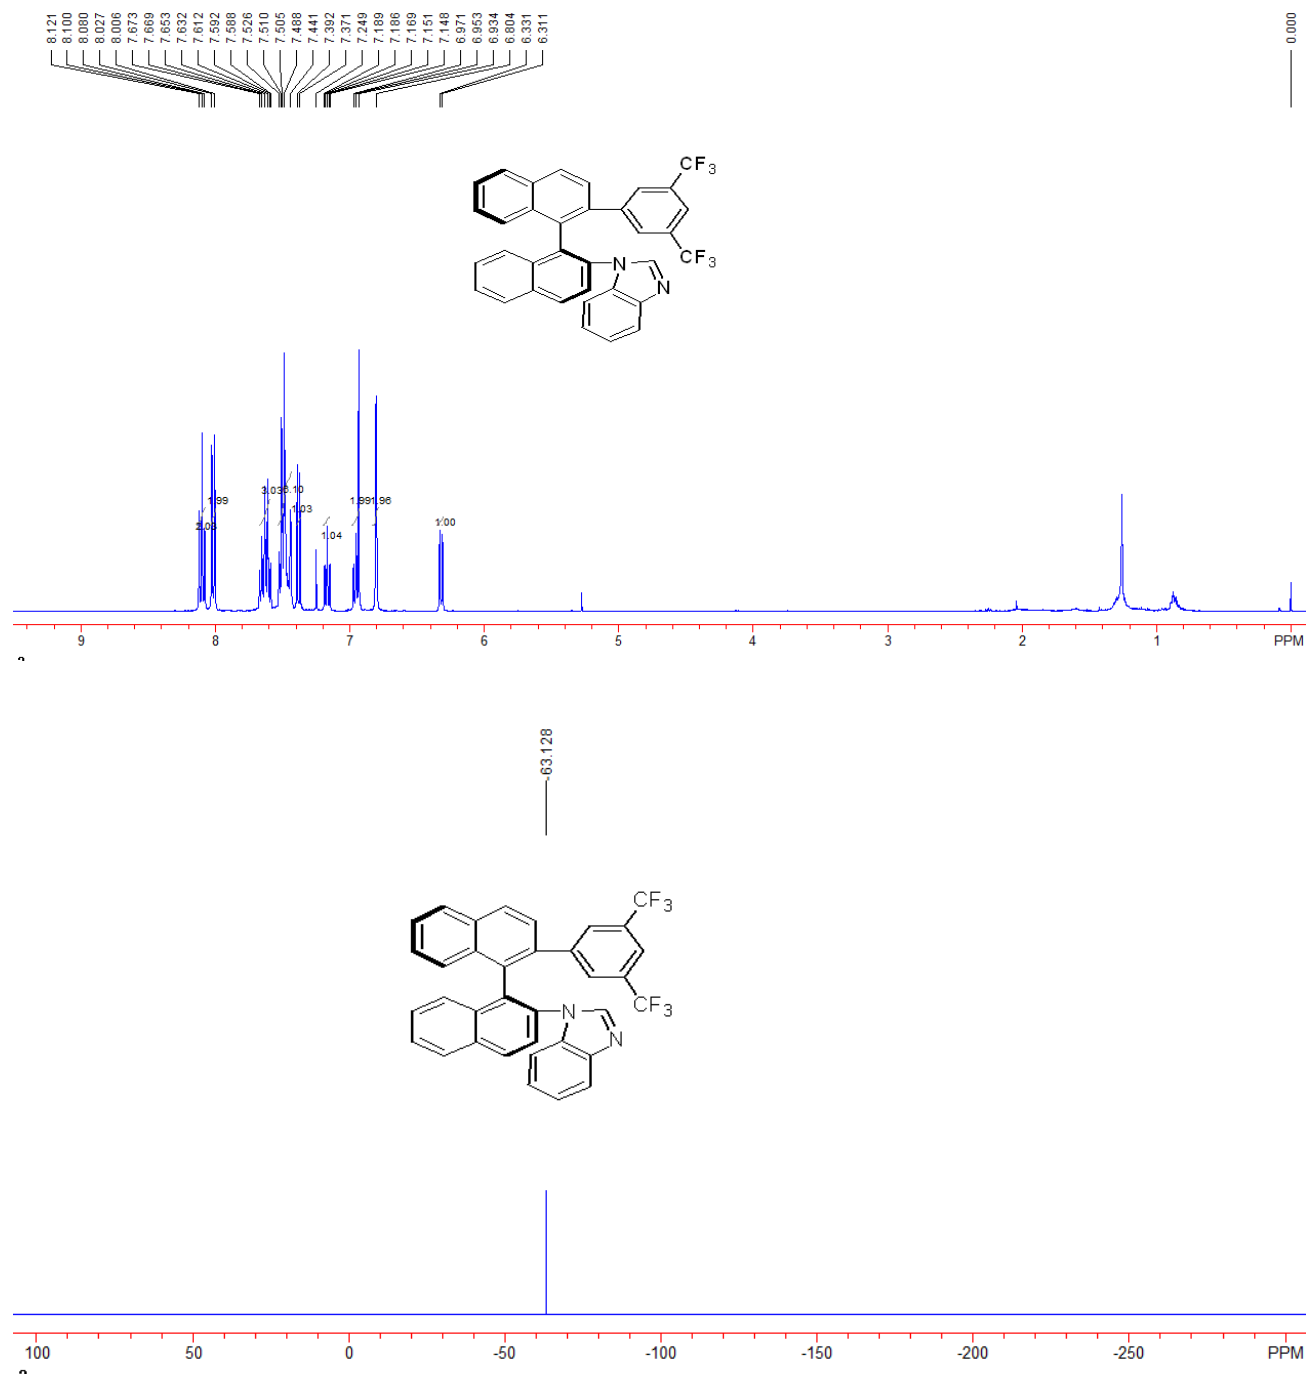

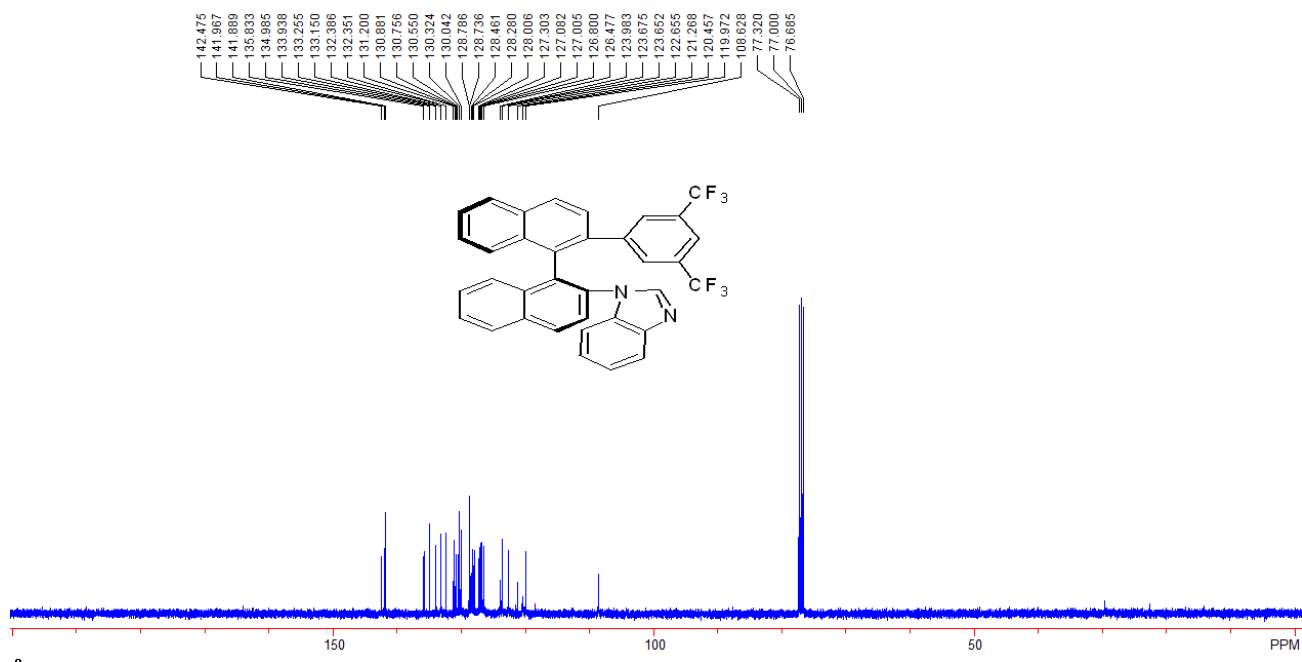

### Synthesis of compound (*S*)-**13**

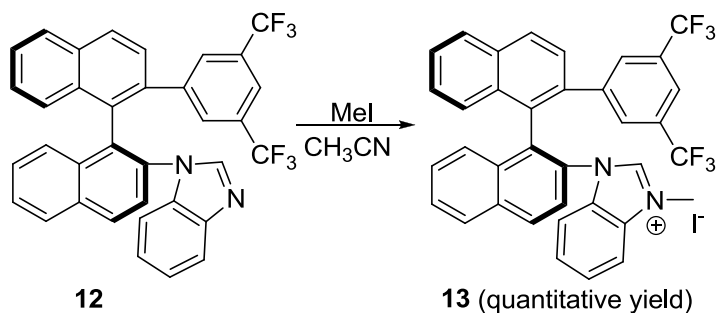

The compound (*S*)-**12** (291 mg, 0.5 mmol) and  $\text{CH}_3\text{I}$  (0.1 mL, 2.0 mmol) in  $\text{CH}_3\text{CN}$  (2.0 mL) were stirred under reflux for 5 h. After cooling to room temperature, volatiles were removed under reduced pressure and the obtained solid compound (*S*)-**13** (362 mg, quantitative yield) was used for the next reaction without further purification.



## Synthesis of compound (S)-14

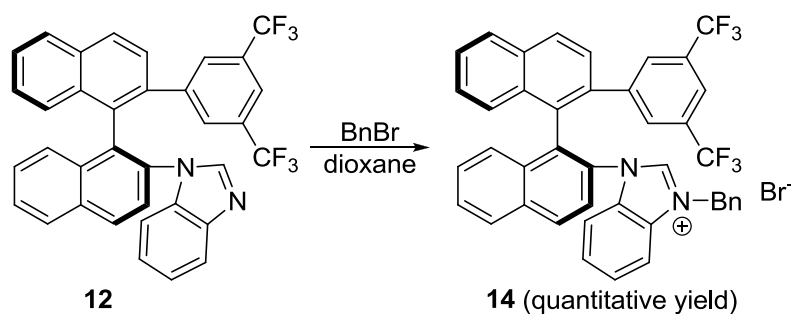

The compound (S)-**12** (291 mg, 0.5 mmol) and BnBr (0.1 mL, 1.0 mmol) in dioxane (2.0 mL) were stirred under reflux for 5 h. After cooling to room temperature, volatiles were removed under reduced pressure and the obtained solid compound (S)-**14** (376 mg, quantitative yield) was used for the next reaction without further purification.

## Synthesis of gold-complexes (S)-15a and (S)-15b

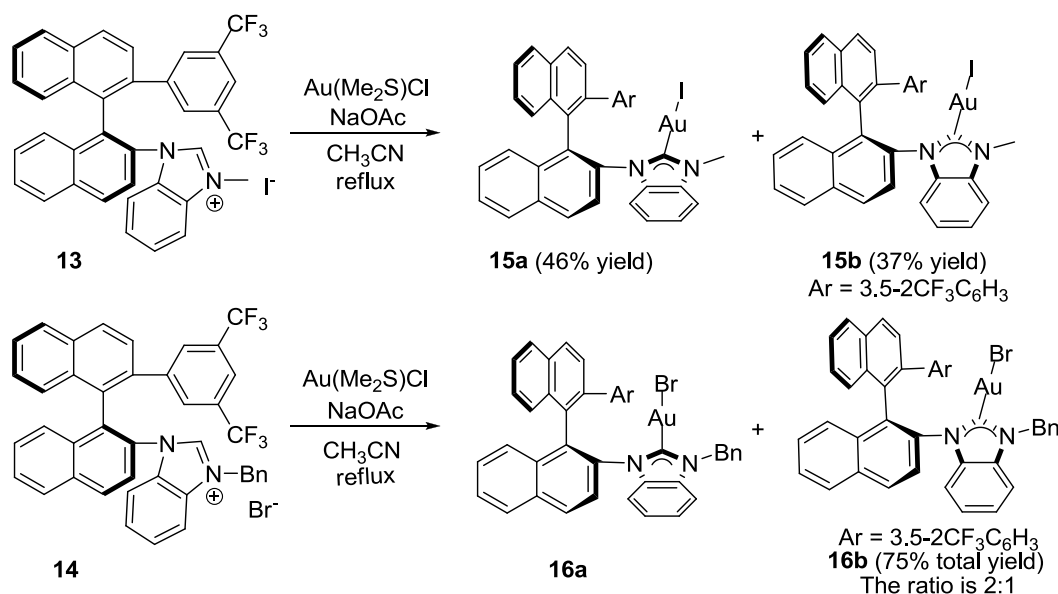

The compound (S)-**13** (145 mg, 0.2 mmol) and  $\text{AuCl} \cdot \text{S}(\text{Me})_2$  (59 mg, 0.2 mmol), NaOAc (33 mg, 0.4 mmol) were refluxed in  $\text{CH}_3\text{CN}$  (2 mL) for overnight. The volatiles were then removed under reduced pressure and the residue was purified by a silica gel flash column chromatography to afford (S)-**15a** (84 mg, 46% yield) and (S)-**15b** (68 mg, 37% yield). A single crystal grown from gold-complex (S)-**15a** or (S)-**15b** in a saturated solution of  $\text{CH}_2\text{Cl}_2$ /pentane was suitable for X-ray crystal analysis. (S)-**15a**: white

solid;  $[\alpha]_D^{20}$  -64.7 (*c* 0.10, CH<sub>2</sub>Cl<sub>2</sub>); <sup>1</sup>H NMR (400 MHz, CDCl<sub>3</sub>, TMS): δ 8.17-8.13 (m, 2H, ArH), 7.94 (d, *J* = 8.8 Hz, 1H, ArH), 7.90-7.88 (m, 1H, ArH), 7.74-7.70 (m, 1H, ArH), 7.66-7.59 (m, 3H, ArH), 7.56-7.50 (m, 2H, ArH), 7.42 (d, *J* = 8.4 Hz, 1H, ArH), 7.34-7.28 (m, 4H, ArH), 7.06 (s, 2H, ArH), 6.86-6.82 (m, 1H, ArH), 5.60 (d, *J* = 8.4 Hz, 1H, ArH), 3.78 (s, 3H, CH<sub>3</sub>); <sup>19</sup>F NMR (376 MHz, CDCl<sub>3</sub>, CFCl<sub>3</sub>): δ -63.096; <sup>13</sup>C NMR (100 MHz, CDCl<sub>3</sub>): δ 141.5, 140.8, 134.9, 134.5, 133.4, 132.9, 132.6, 131.3, 131.0, 130.9, 130.7, 129.9, 129.2, 129.1, 129.0, 128.5, 128.41, 128.37, 127.9, 127.6, 127.3, 126.9, 126.8, 126.4, 123.7, 123.4, 121.0, 120.6, 113.2, 111.4, 34.8. IR (CH<sub>2</sub>Cl<sub>2</sub>): ν 3059, 2926, 1594, 1385, 1346, 1277, 1182, 1133, 897, 820, 745, 713 cm<sup>-1</sup>; MS (*m/z*): HRMS (ESI) Calcd. for C<sub>36</sub>H<sub>26</sub>AuF<sub>6</sub>IN<sub>3</sub> ([M+NH<sub>4</sub>]<sup>+</sup>); 938.0736. Found: 938.0728.

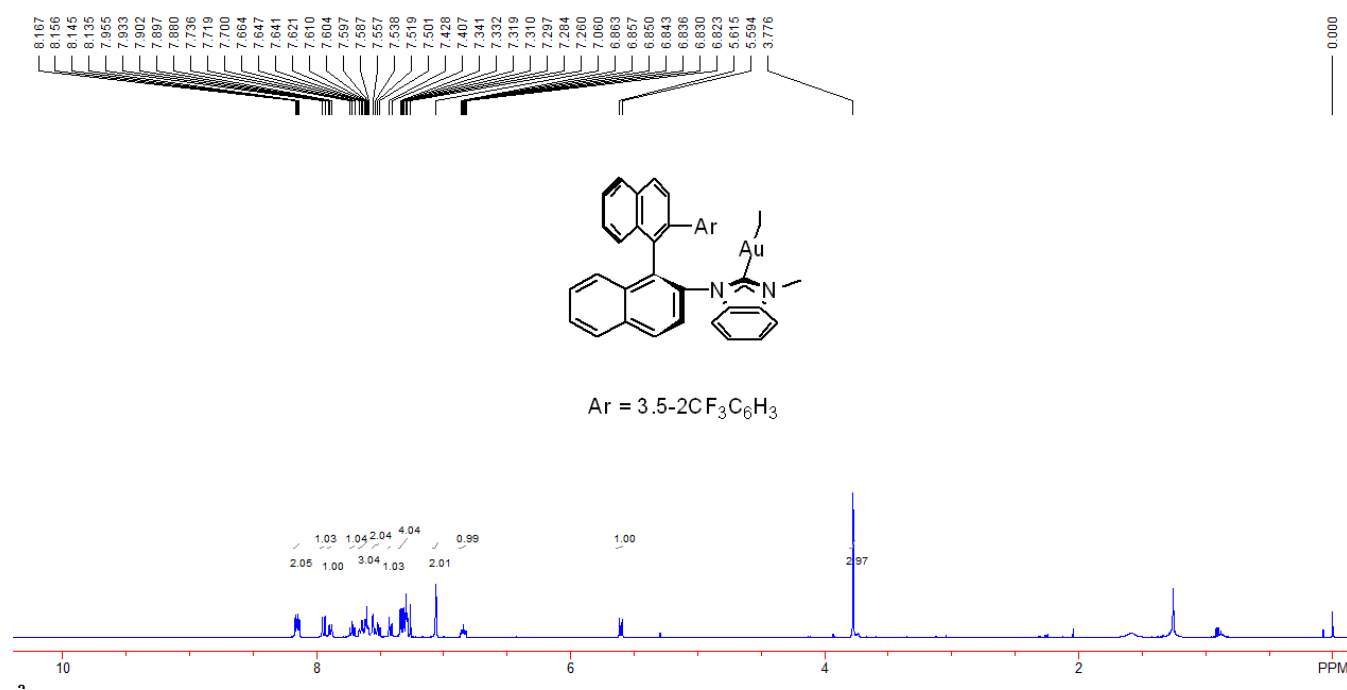

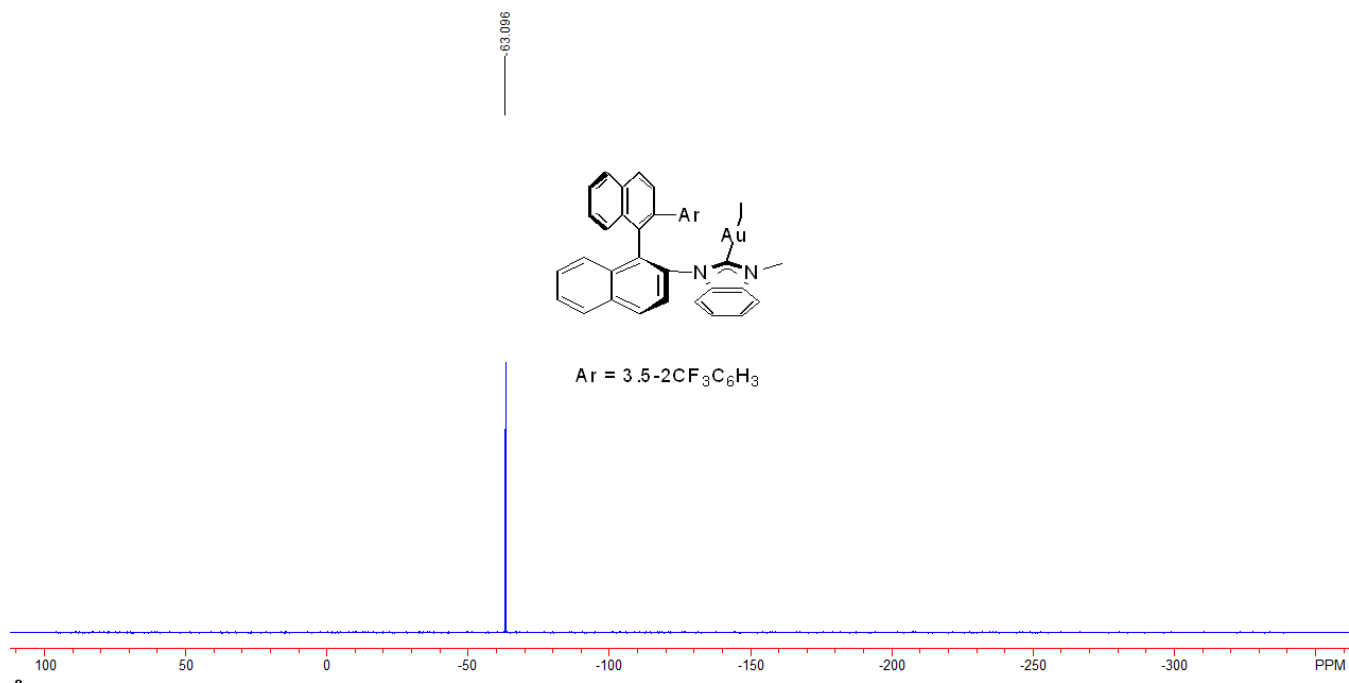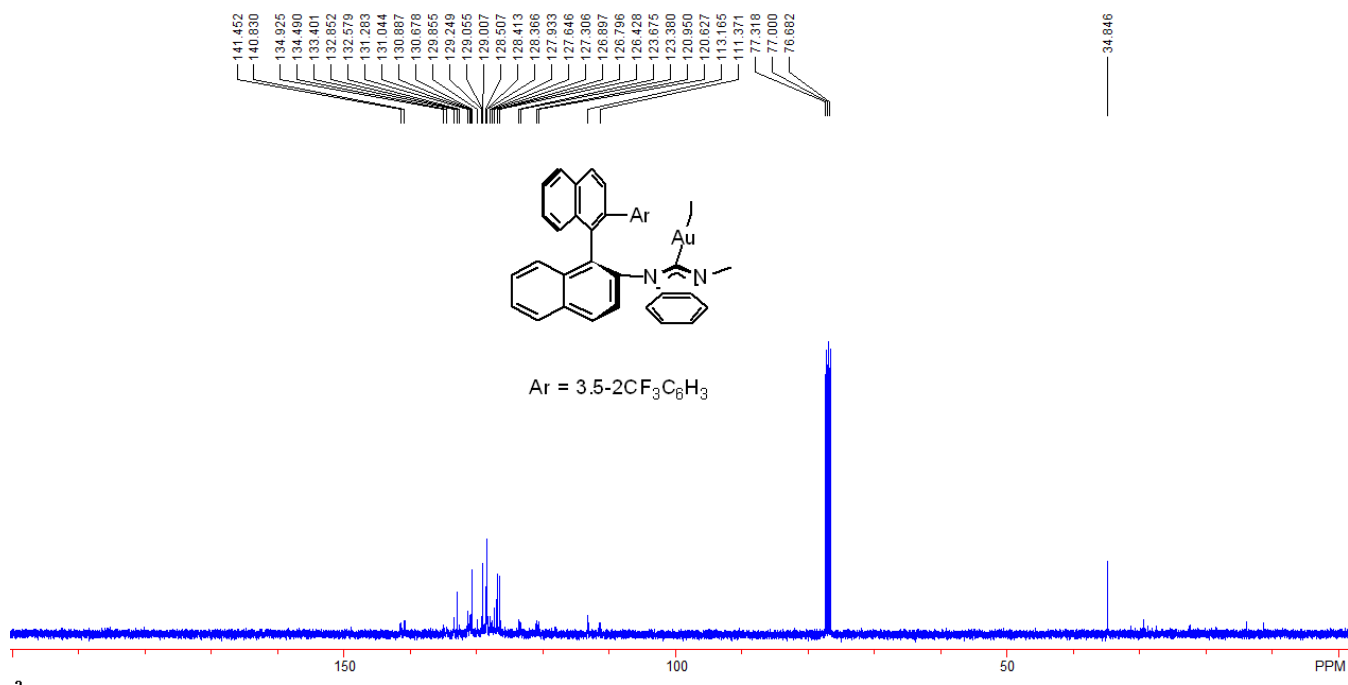

**(S)-15b**: white solid;  $[\alpha]_{\text{D}}^{20} -66.1$  ( $c$  1.45,  $\text{CH}_2\text{Cl}_2$ );  $^1\text{H}$  NMR (400 MHz,  $\text{CDCl}_3$ , TMS):  $\delta$  8.17 (d,  $J = 8.4$  Hz, 1H, ArH), 8.13 (d,  $J = 8.0$  Hz, 1H, ArH), 7.85 (d,  $J = 8.0$  Hz, 1H, ArH), 7.79-7.69 (m, 4H, ArH), 7.63 (d,  $J = 8.0$  Hz, 1H, ArH), 7.59-7.54 (m, 3H, ArH), 7.50-7.46 (m, 1H, ArH), 7.23 (d,  $J = 8.8$  Hz, 2H, ArH), 7.17 (s, 2H, ArH), 7.08-7.04 (m, 1H, ArH), 6.47-6.42 (m, 2H, ArH), 3.94 (s, 3H,  $\text{CH}_3$ );  $^{19}\text{F}$  NMR (376 MHz,  $\text{CDCl}_3$ ,  $\text{CFCl}_3$ ):  $\delta$  -62.451;  $^{13}\text{C}$  NMR (100 MHz,  $\text{CDCl}_3$ ):  $\delta$  134.6, 134.5, 134.1,

S19

134.0, 133.6, 131.4, 131.34, 131.27, 129.1, 129.0, 128.8, 128.7, 128.66, 128.58, 128.5, 128.3, 128.2, 127.8, 126.9, 126.5, 124.1, 123.4, 118.6, 31.9. IR (CH<sub>2</sub>Cl<sub>2</sub>):  $\nu$  2923, 2851, 1726, 1465, 1387, 1277, 1181, 1131, 894, 823, 743, 712, 681 cm<sup>-1</sup>; MS (m/z): HRMS (ESI) Calcd. for C<sub>36</sub>H<sub>26</sub>AuF<sub>6</sub>IN<sub>3</sub> ([M + NH<sub>4</sub>]<sup>+</sup>); 938.0736. Found: 938.0725.

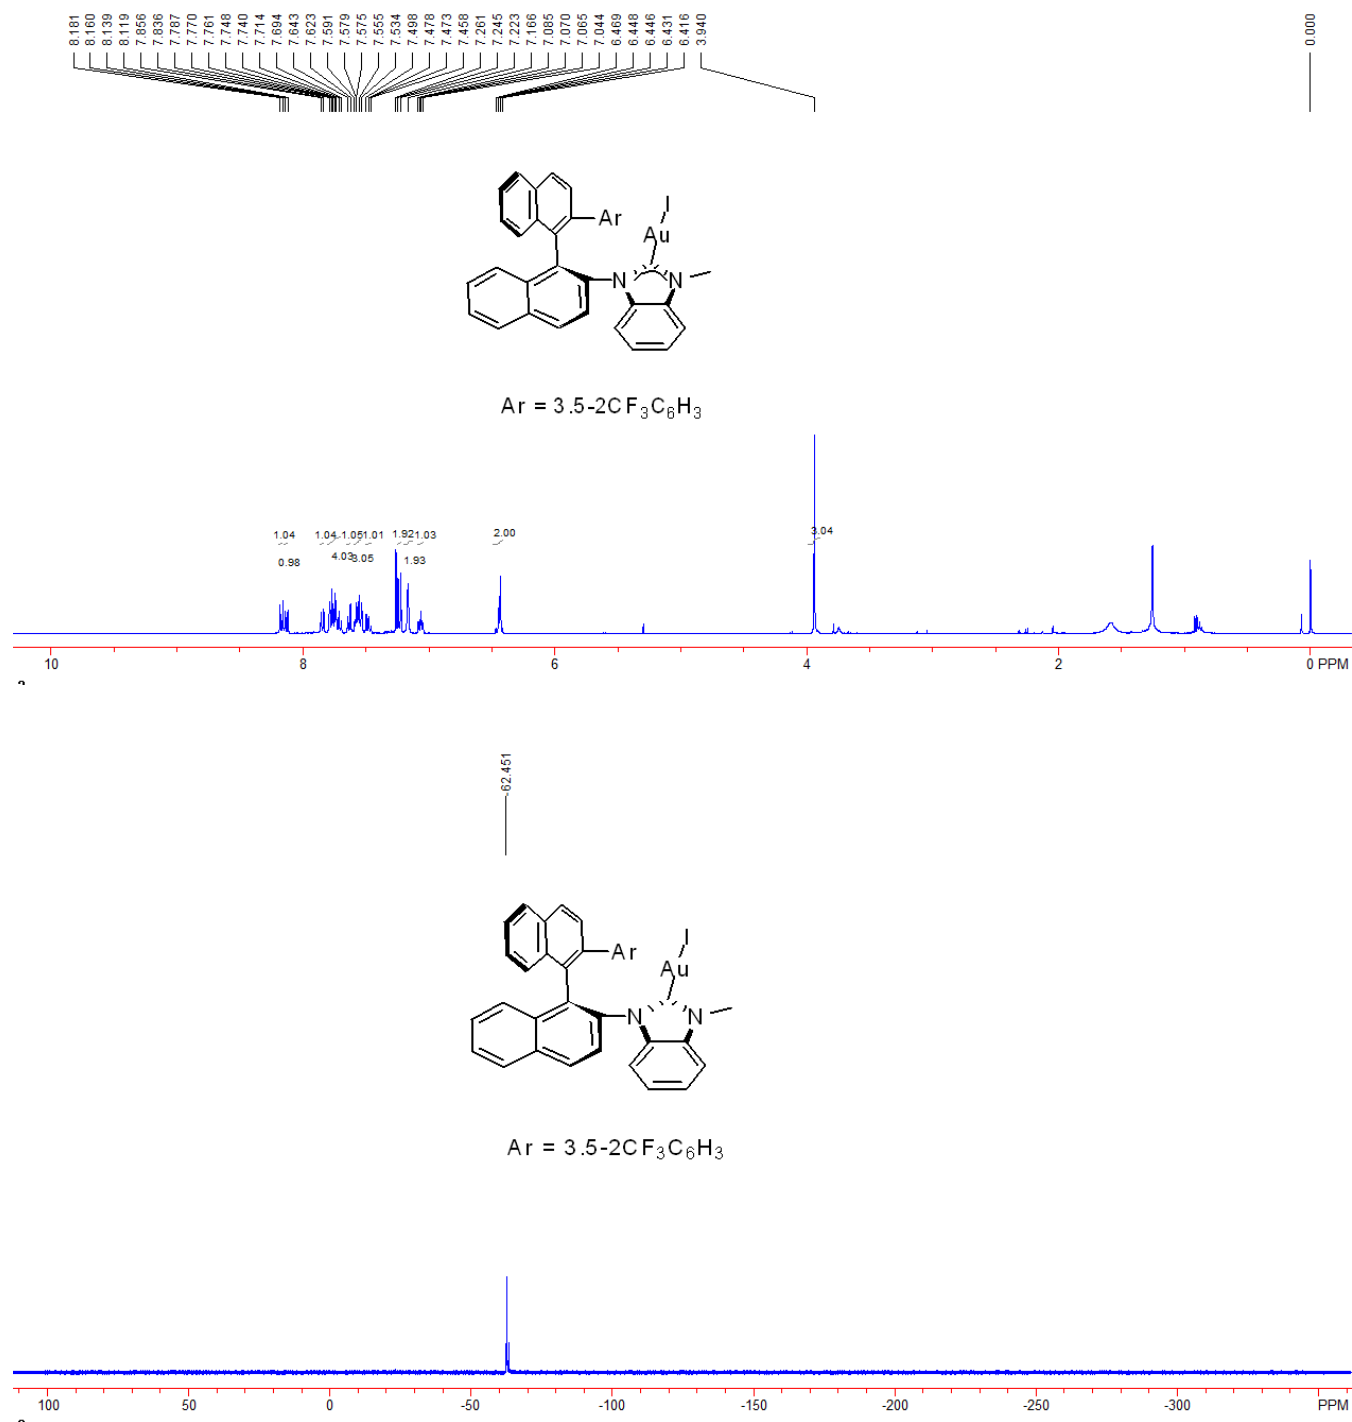

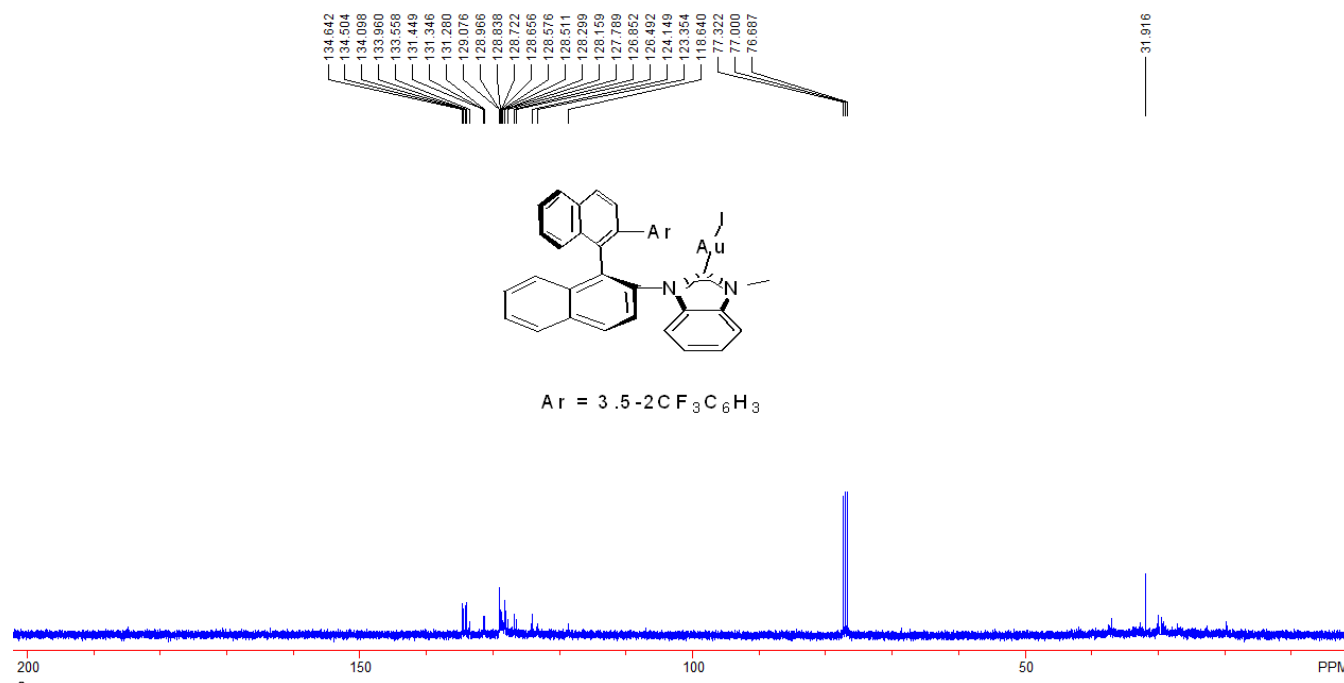

### Synthesis of gold complex (S)-16

The compound (S)-14 (152 mg, 0.2 mmol) and  $\text{AuCl} \cdot \text{S}(\text{Me})_2$  (59 mg, 0.2 mmol), NaOAc (33 mg, 0.4 mmol) were refluxed in  $\text{CH}_3\text{CN}$  (2 mL) for overnight. The volatiles were then removed under reduced pressure and the residue was purified by a silica gel flash column chromatography. Gold complex (S)-16 (142 mg, 75% total yield) was obtained as mixture: white solid;  $[\alpha]_D^{20}$  -82.2 ( $c$  0.75,  $\text{CH}_2\text{Cl}_2$ );  $^1\text{H}$  NMR (400 MHz,  $\text{CDCl}_3$ , TMS):  $\delta$  8.21-8.11 (m, 5H, ArH), 8.02 (d,  $J$  = 8.8 Hz, 2H, ArH), 7.95 (d,  $J$  = 8.4 Hz, 2H, ArH), 7.85-7.42 (m, 29H, ArH), 7.35-7.26 (m, 15H, ArH), 7.20-7.18 (m, 2H, ArH), 7.14-7.13 (m, 4H, ArH), 7.06 (d,  $J$  = 8.0 Hz, 1H, ArH), 6.95-6.92 (m, 5H, ArH), 6.80-6.75 (m, 6H, ArH), 6.52 (d,  $J$  = 8.0 Hz, 1H, ArH), 6.47-6.43 (m, 1H, ArH), 5.84 (d,  $J$  = 15.6 Hz, 1H,  $\text{CH}_2$ ), 5.75-5.72 (m, 4H, ArH and  $\text{CH}_2$ ), 5.36 (d,  $J$  = 15.6 Hz, 1H,  $\text{CH}_2$ ), 5.14 (d,  $J$  = 15.2 Hz, 2H,  $\text{CH}_2$ );  $^{19}\text{F}$  NMR (376 MHz,  $\text{CDCl}_3$ ,  $\text{CFCl}_3$ ):  $\delta$  -62.571, -63.093;  $^{13}\text{C}$  NMR (100 MHz,  $\text{CDCl}_3$ ):  $\delta$  142.4, 135.3, 134.45, 134.38, 133.3, 132.8, 132.5, 130.70, 130.66, 130.59, 130.0, 129.8, 129.2, 129.0, 128.9, 128.8, 128.7, 128.5, 128.4, 127.9, 127.8, 127.68, 127.56, 127.4, 127.2, 127.14, 127.05, 126.9, 126.8, 126.6, 125.4, 124.53, 124.46, 124.2, 123.0, 120.5, 111.5, 110.8, 52.6. IR ( $\text{CH}_2\text{Cl}_2$ ):  $\nu$  3061, 2924, 1594, 1478, 1406, 1278, 1182, 1133, 897,

820, 745, 706  $\text{cm}^{-1}$ ; MS (m/z): HRMS (ESI) Calcd. for  $\text{C}_{42}\text{H}_{30}\text{AuBrF}_6\text{N}_3$  ( $[\text{M} + \text{NH}_4]^+$ ); 966.1187.

Found: 966.1185.

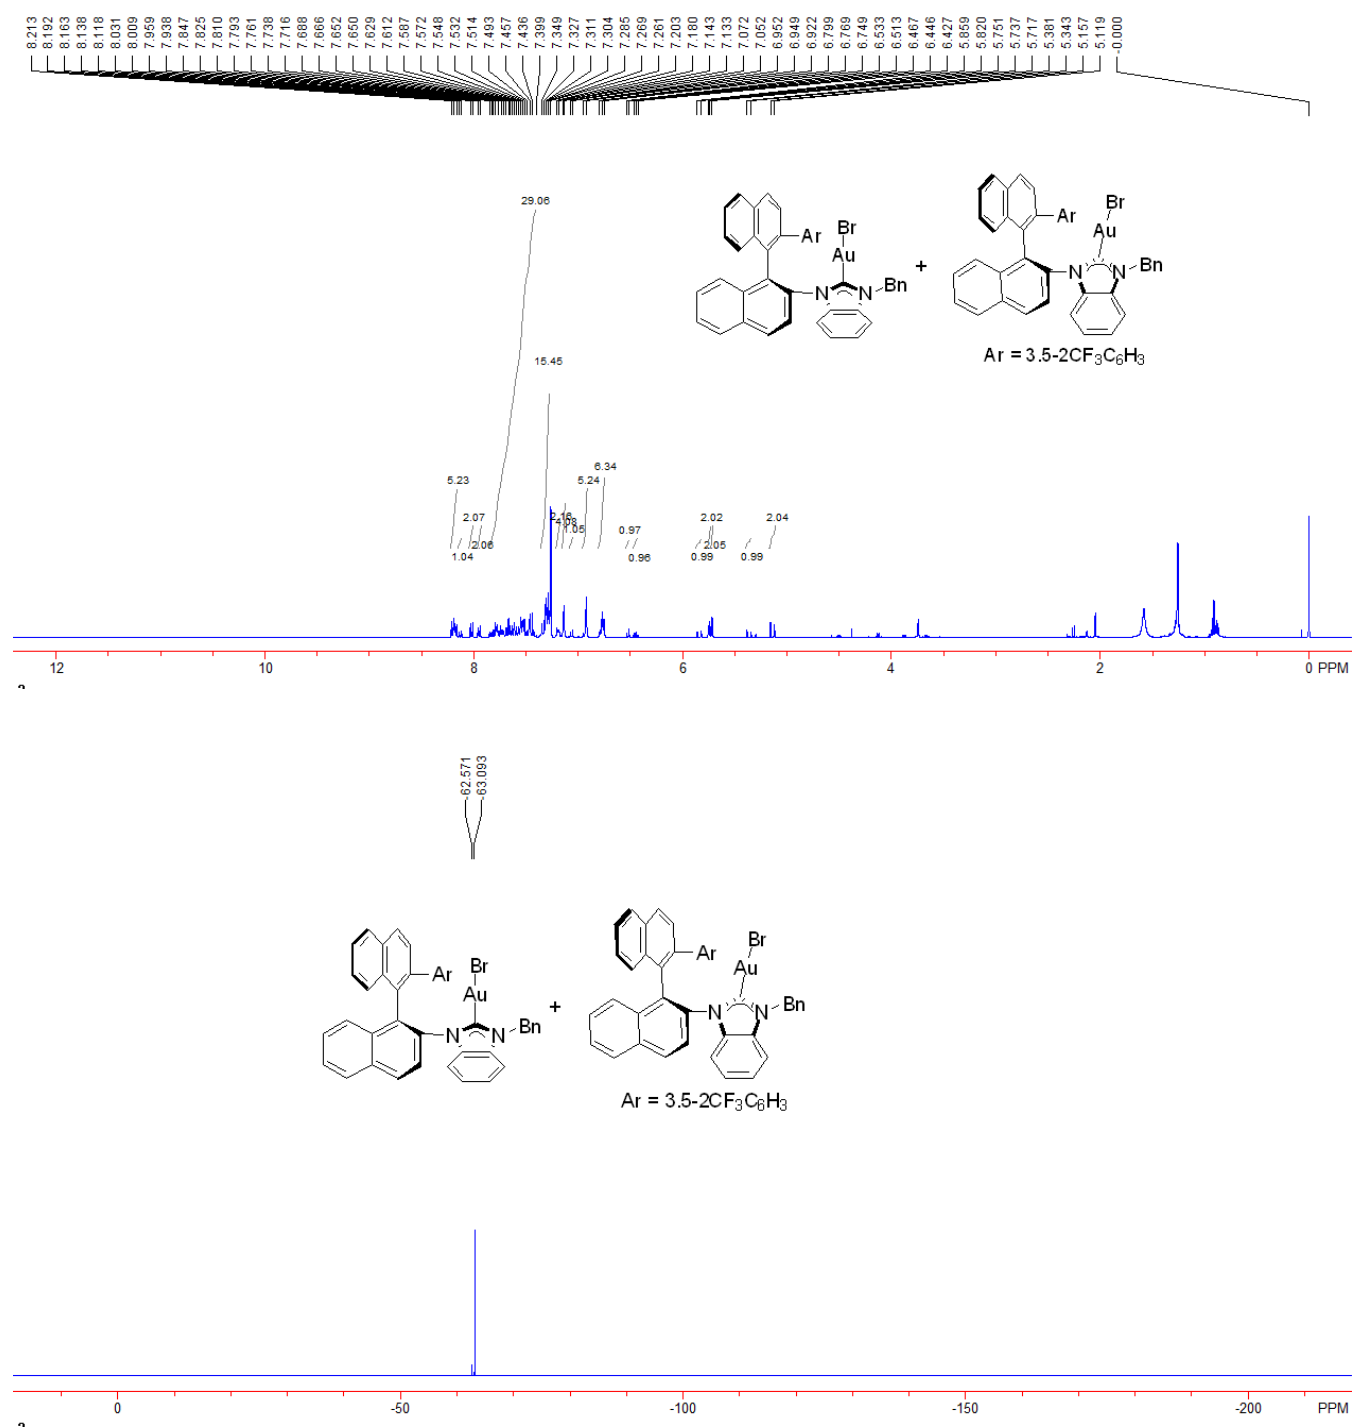

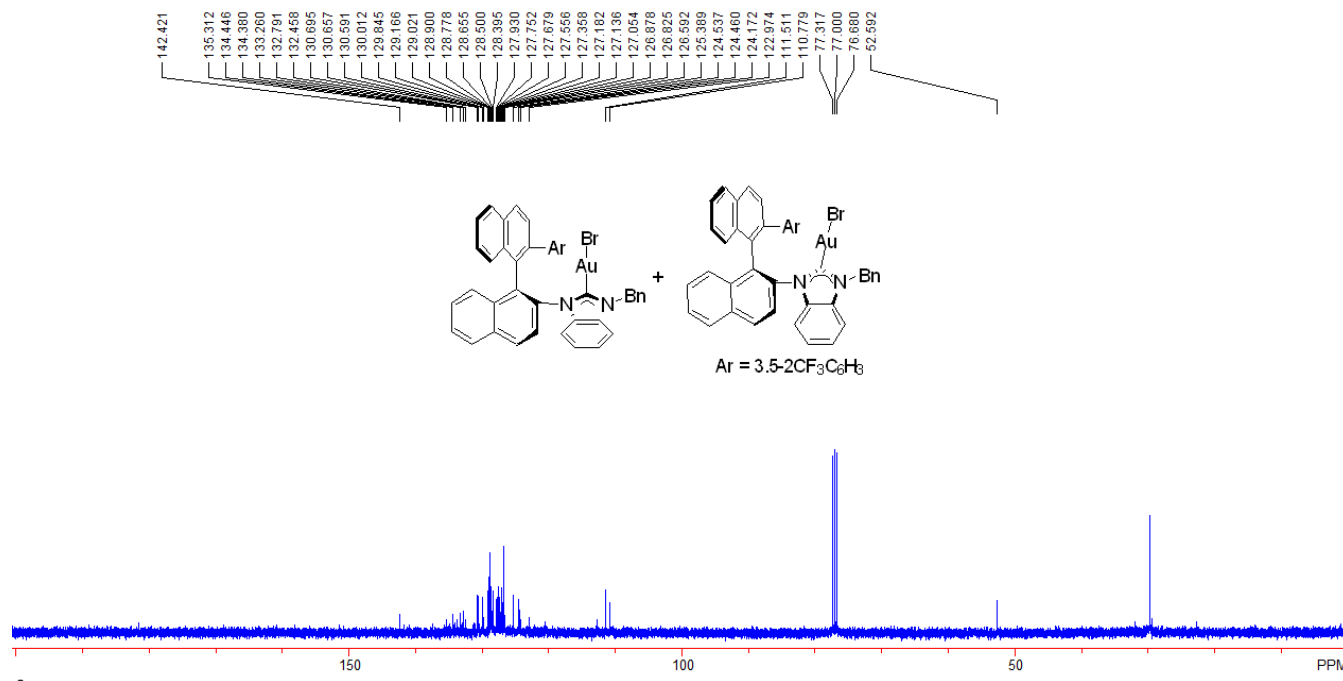

## The synthesis of P–Au(I) complexes

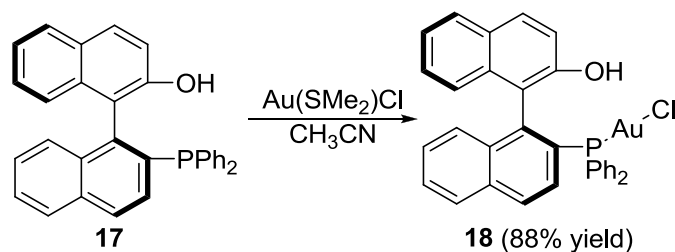

(S)-2'-(diphenylphosphino)-1,1'-binaphthyl-2-ol (**17**) was prepared according to published literature procedures.<sup>2</sup>

## Synthesis of gold-complex (S)-18

The compound (S)-**17** (454 mg, 1.0 mmol) and  $\text{AuCl}\cdot\text{S}(\text{Me})_2$  (294 mg, 1.0 mmol) were stirred in  $\text{CH}_3\text{CN}$  (10 mL) for overnight. The volatiles were then removed under reduced pressure and the residue was purified by a silica gel flash column chromatography to afford pure product (S)-**18** (603 mg, 88% yield). A single crystal grown from gold complex (S)-**18** in a saturated solution of  $\text{CH}_2\text{Cl}_2$ /pentane was

suitable for X-ray crystal analysis. white solid;  $[\alpha]_D^{20}$  -35.4 (*c* 0.20, CH<sub>2</sub>Cl<sub>2</sub>); <sup>1</sup>H NMR (400 MHz, CDCl<sub>3</sub>, TMS): δ 7.99-7.93 (m, 3H, ArH), 7.80 (d, *J* = 8.4 Hz, 1H, ArH), 7.60-7.56 (m, 1H, ArH), 7.50-7.45 (m, 3H, ArH), 7.42-7.17 (m, 12H, ArH), 6.86-6.82 (m, 1H, ArH), 6.45 (d, *J* = 8.4 Hz, 1H, ArH), 5.17 (br, 1H, OH); <sup>31</sup>P NMR (162 MHz, CDCl<sub>3</sub>, 85% H<sub>3</sub>PO<sub>4</sub>): δ 26.116; <sup>13</sup>C NMR (100 MHz, CDCl<sub>3</sub>): δ 141.8, 136.5, 134.4, 133.7, 133.24, 133.22, 133.1, 132.39, 132.35, 130.5, 130.2, 129.8, 129.0, 128.9, 128.6, 128.4, 127.6, 127.3, 127.2, 127.1, 127.0, 126.6, 124.2, 123.7, 123.0, 112.6, 110.4. IR (CH<sub>2</sub>Cl<sub>2</sub>): ν 3359, 3055, 2924, 1623, 1513, 1435, 1269, 1098, 972, 937, 814, 743, 692 cm<sup>-1</sup>; MS (*m/z*): HRMS (ESI) Calcd. for C<sub>32</sub>H<sub>27</sub>AuClNOP ([M+NH<sub>4</sub>]<sup>+</sup>); 704.1179. Found: 704.1170.

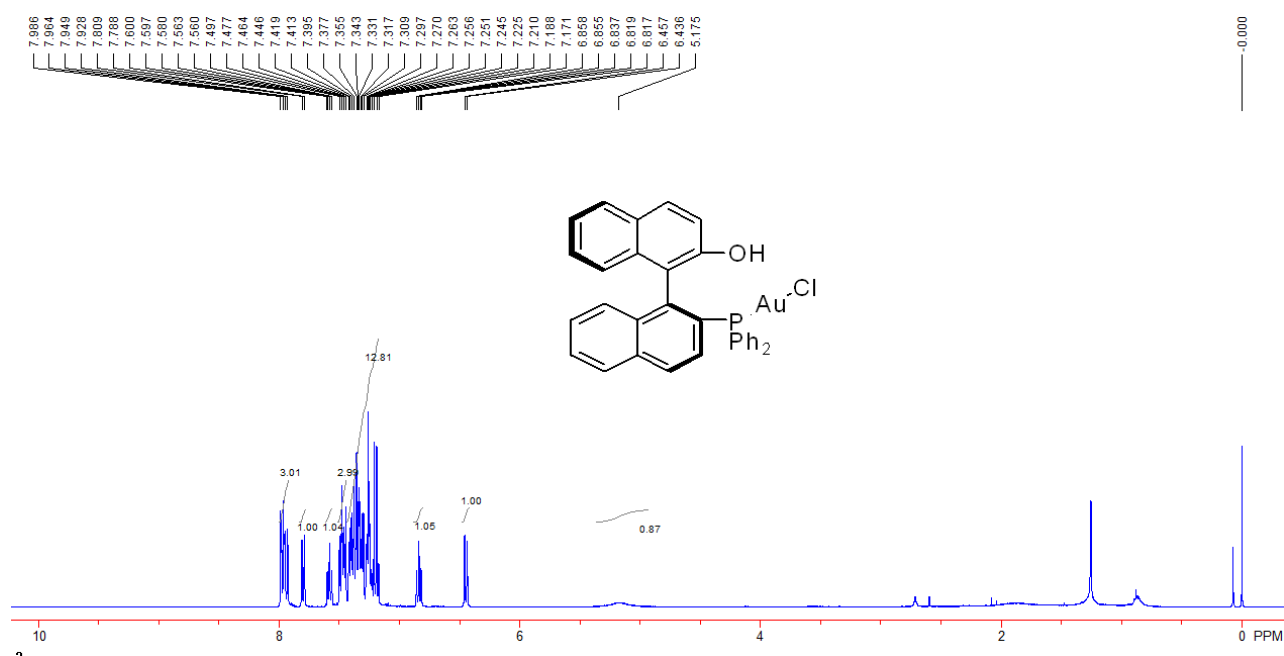



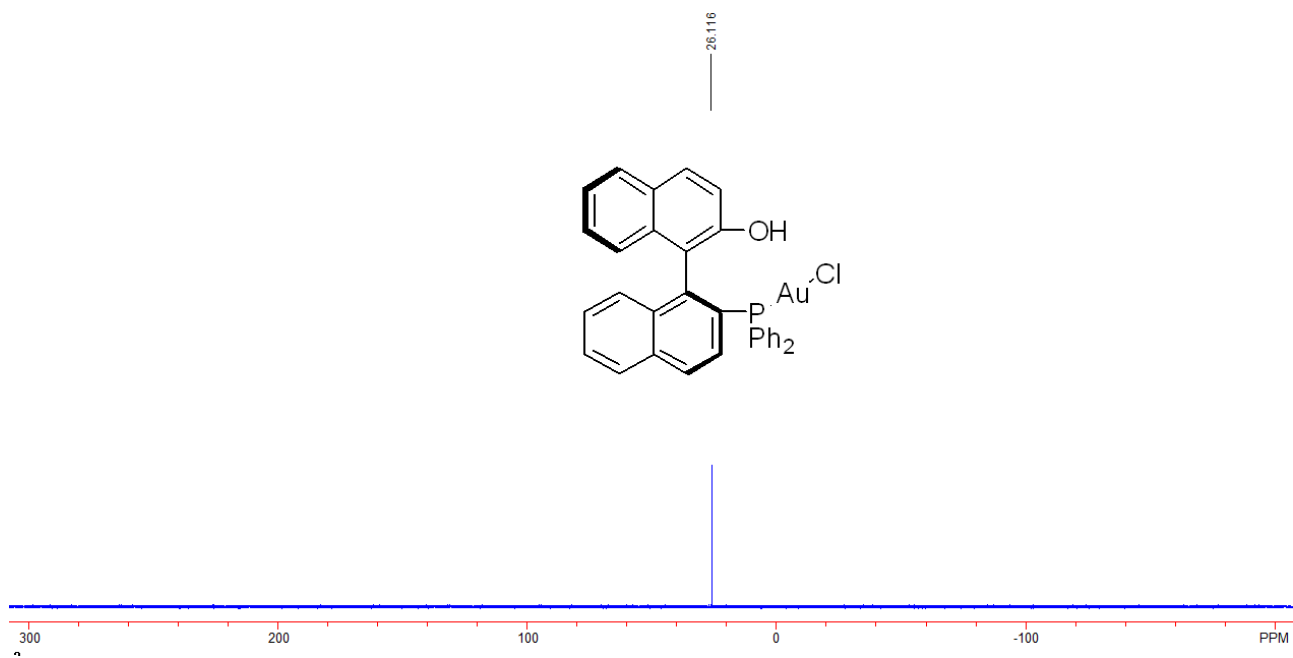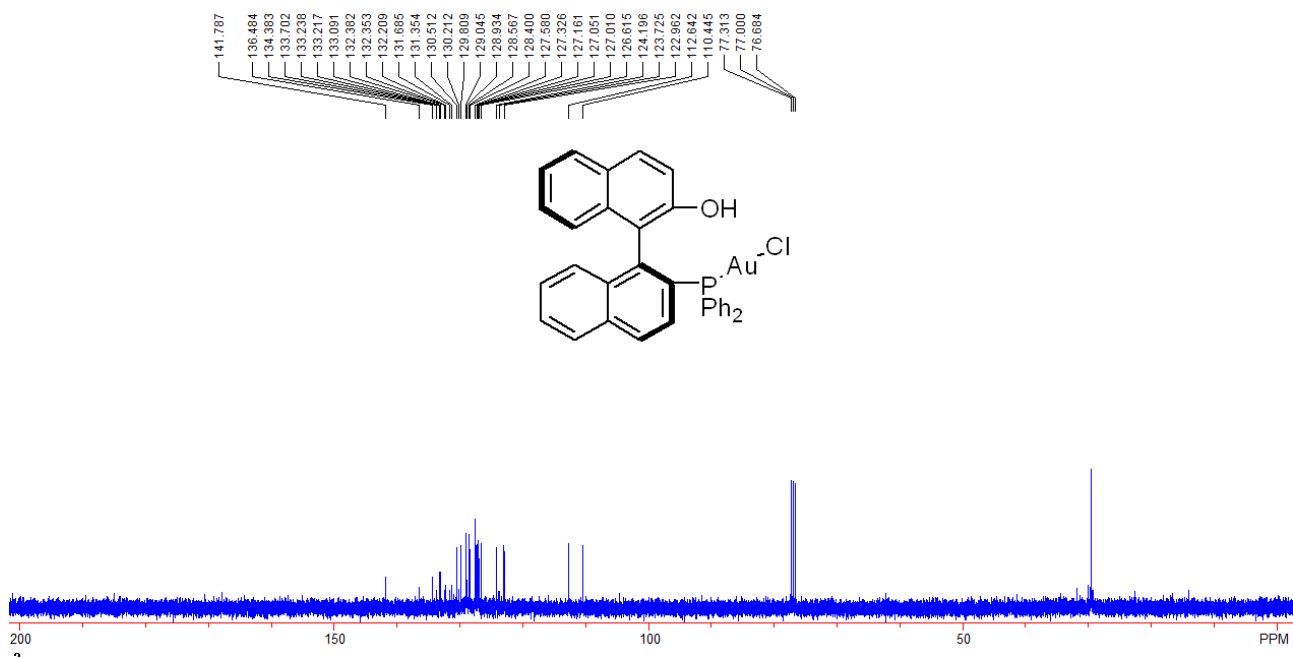

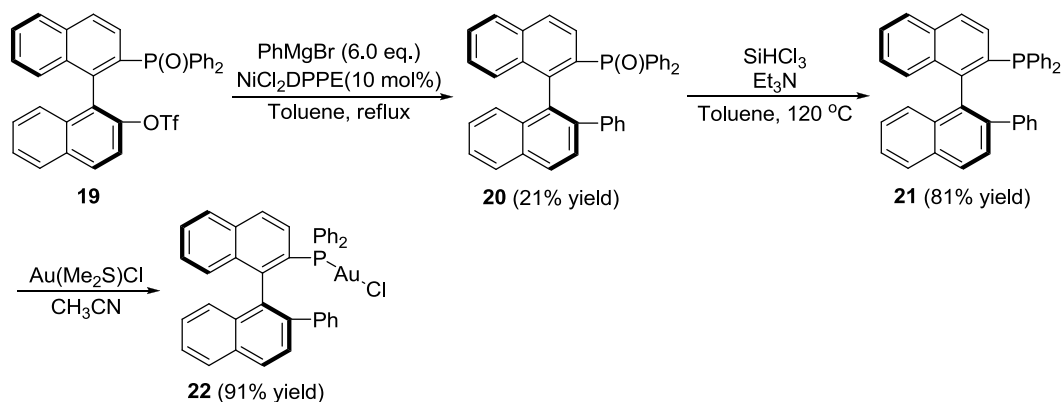

(*S*)-2'-(diphenylphosphoryl)-1,1'-binaphthyl-2-yl trifluoromethanesulfonate **19** was prepared according to the previous literature procedures.<sup>2</sup>

### Synthesis of (*S*)-diphenyl(2'-phenyl-[1,1'-binaphthalen]-2-yl)phosphine oxide (**20**)

(*S*)-2'-(diphenylphosphoryl)-1,1'-binaphthyl-2-yl trifluoromethanesulfonate **19** (3.01 g, 5 mmol) and  $\text{NiCl}_2(\text{dppe})$  (285 mg, 0.5 mmol) was dissolved into toluene (40 mL) under argon. To this solution was added dropwise a 1 M THF solution of phenylmagnesium bromide (30 mL, 30 mmol) at 0 °C, and stirring was continued under reflux for overnight. The reaction was quenched with saturated  $\text{NH}_4\text{Cl}$  carefully and extractive workup was conducted with EA. The organic extracts were washed with brine and dried over anhydrous  $\text{Na}_2\text{SO}_4$ . Removal of solvents and purification of the residual oil by column chromatography on silica gel afforded compound (*S*)-**20** (556 mg, 21% yield) as yellow powder. This is a new compound. white solid;  $[\alpha]_D^{20}$  -168.3 (*c* 0.80,  $\text{CH}_2\text{Cl}_2$ );  $^1\text{H}$  NMR (400 MHz,  $\text{CDCl}_3$ , TMS):  $\delta$  7.88 (d,  $J$  = 8.4 Hz, 1H, ArH), 7.85-7.82 (m, 2H, ArH), 7.78 (d,  $J$  = 8.0 Hz, 1H, ArH), 7.56-7.47 (m, 3H, ArH), 7.35-7.28 (m, 5H, ArH), 7.17-7.00 (m, 12H, ArH), 6.94 (t,  $J$  = 8.0 Hz, 2H, ArH), 6.87 (d,  $J$  = 8.8 Hz, 1H, ArH).  $^{31}\text{P}$  NMR (162 MHz,  $\text{CDCl}_3$ , 85%  $\text{H}_3\text{PO}_4$ ):  $\delta$  33.064;  $^{13}\text{C}$  NMR (100 MHz,  $\text{CDCl}_3$ ):  $\delta$  143.7, 143.6, 141.2, 139.1, 134.7, 134.6, 133.85, 133.82, 133.2, 132.7, 132.34, 132.29, 132.14, 132.09, 131.7, 131.49, 131.47, 131.39, 131.38, 131.30, 131.28, 131.17, 131.14, 131.09, 129.4, 128.8, 128.7, 128.6, 128.3, 128.1, 128.04, 128.02, 127.9, 127.8, 127.7, 127.64, 127.62, 127.47, 127.44, 127.3, 127.27,

127.1, 126.8, 126.3, 126.0, 125.3; IR (CH<sub>2</sub>Cl<sub>2</sub>):  $\nu$  3054, 1591, 1495, 1436, 1200, 1115, 1028, 873, 819, 762, 722, 694 cm<sup>-1</sup>; MS (m/z): HRMS (ESI) Calcd. for C<sub>38</sub>H<sub>28</sub>OP ([M+H]<sup>+</sup>); 531.1872. Found: 531.1865.

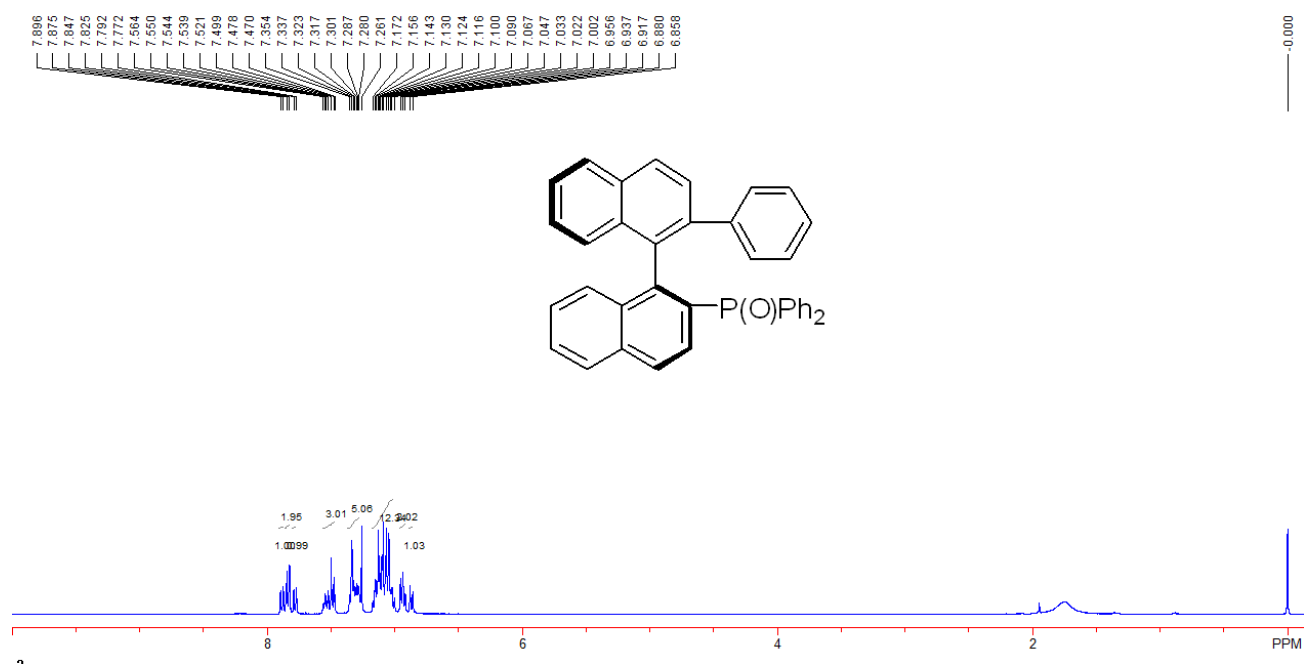

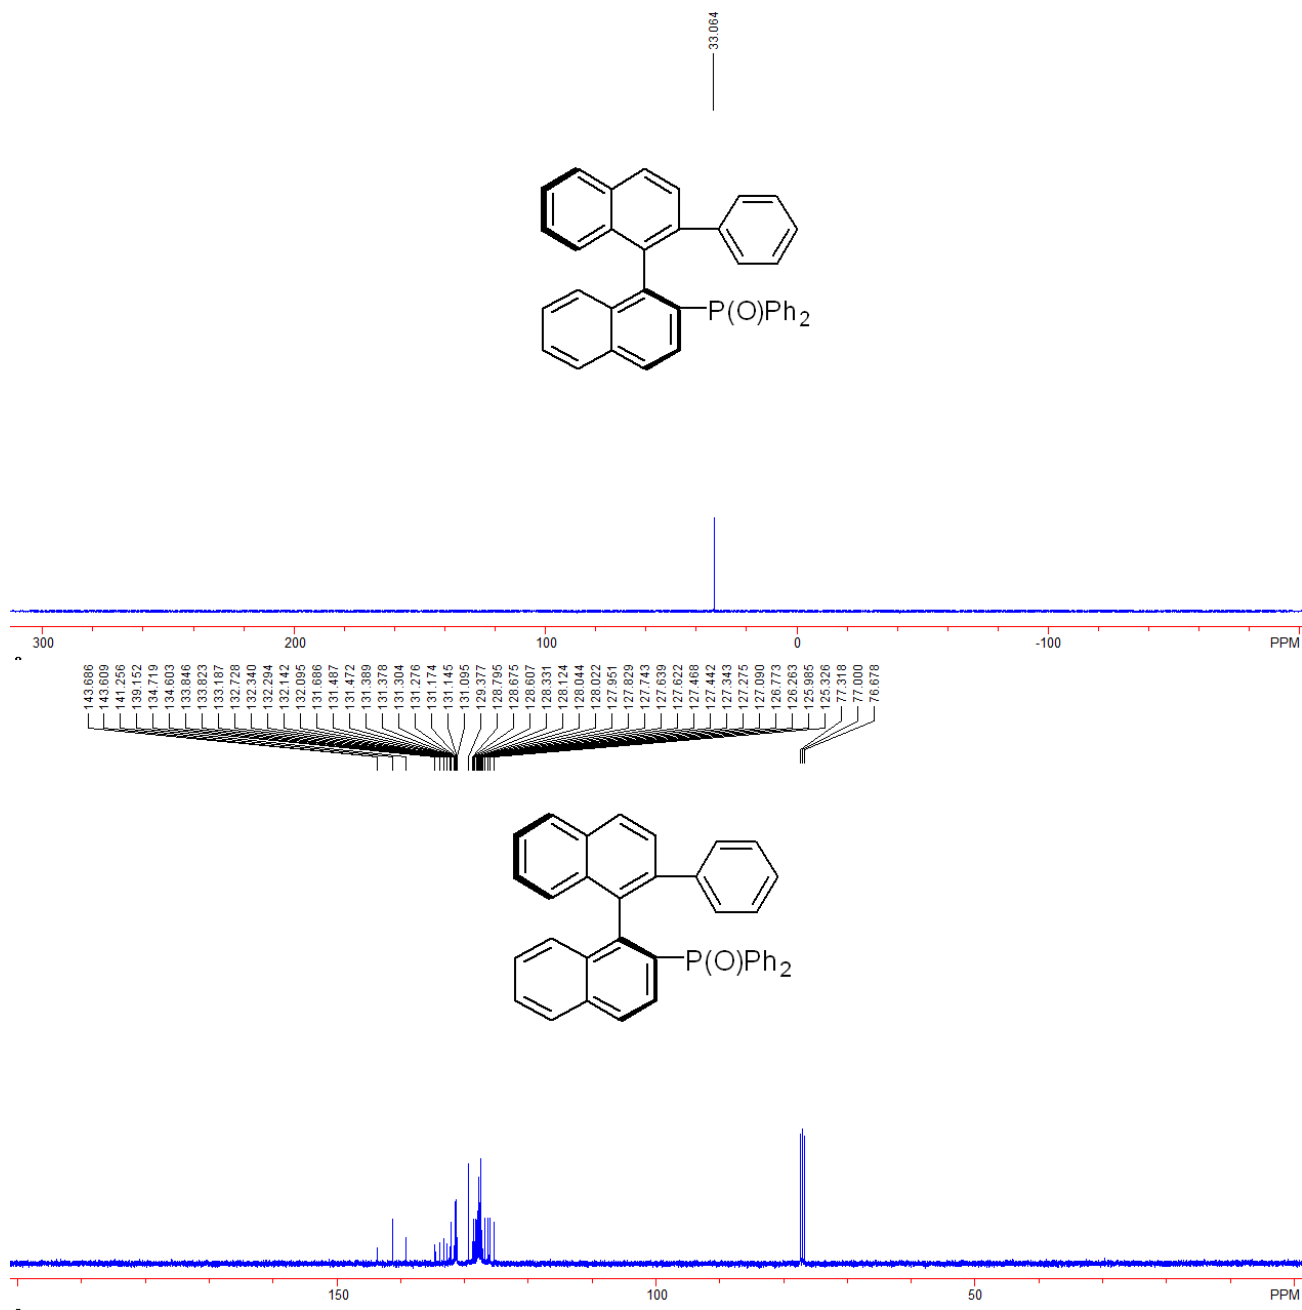

### Synthesis of (*S*)-diphenyl(2'-phenyl-[1,1'-binaphthalen]-2-yl)phosphine (21)

Et<sub>3</sub>N (0.3 mL, 2 mmol) was added dropwise to a solution of compound (*S*)-**20** in toluene (530 mg, 1.0 mmol) under argon. This solution was added SiHCl<sub>3</sub> (0.2 mL, 2.0 mmol) under an ice-water bath, and stirring was continued at 120 °C for overnight. The reaction was quenched with saturated NH<sub>4</sub>Cl carefully and extractive workup was conducted with EA. The organic extracts were washed with brine and dried over anhydrous Na<sub>2</sub>SO<sub>4</sub>. Removal of solvents and purification of the residual oil by column



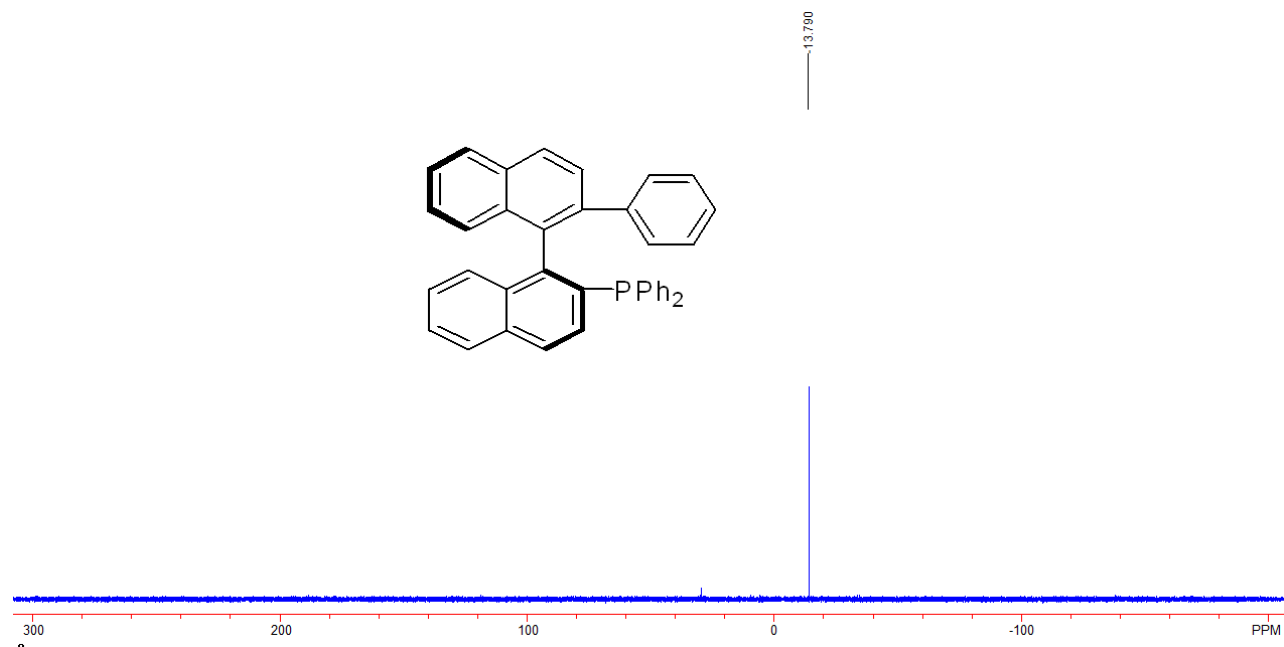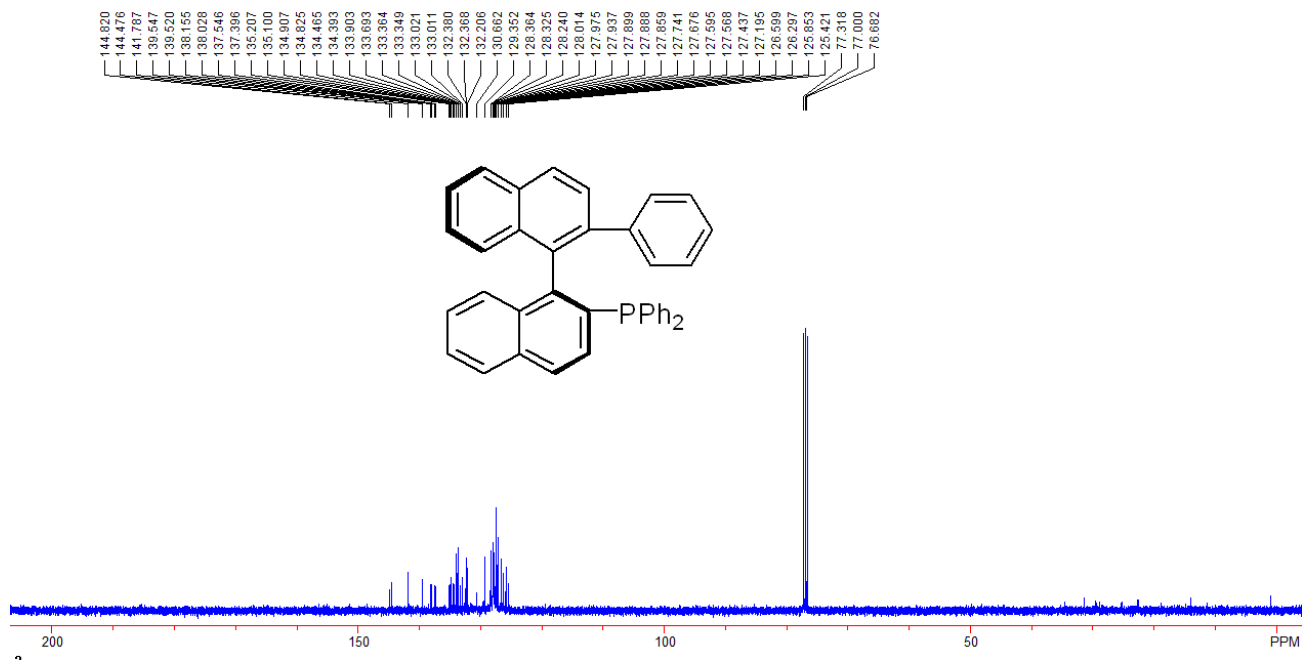

### Synthesis of gold complex (S)-22

The compound (S)-21 (257 mg, 0.5 mmol) and AuCl·S(Me)<sub>2</sub> (147 mg, 0.5 mmol) were stirred in CH<sub>3</sub>CN (5 mL) for overnight. The volatiles were then removed under reduced pressure and the residue was purified by a silica gel flash column chromatography to afford (S)-22 (339 mg, 91% yield). A single crystal grown from gold complex **22** in a solution of CH<sub>2</sub>Cl<sub>2</sub>/pentane was suitable for X-ray crystal

analysis. white solid;  $[\alpha]_D^{20}$  -80.7 (*c* 0.95, CH<sub>2</sub>Cl<sub>2</sub>); <sup>1</sup>H NMR (400 MHz, CDCl<sub>3</sub>, TMS): δ 8.27 (d, *J* = 8.8 Hz, 1H, ArH), 8.05 (d, *J* = 8.4 Hz, 1H, ArH), 7.90 (d, *J* = 8.0 Hz, 1H, ArH), 7.84 (d, *J* = 8.4 Hz, 1H, ArH), 7.67 (d, *J* = 8.4 Hz, 1H, ArH), 7.62-7.57 (m, 1H, ArH), 7.47 (t, *J* = 7.6 Hz, 1H, ArH), 7.40-7.35 (m, 4H, ArH), 7.28-7.24 (m, 2H, ArH), 7.22-7.12 (m, 6H, ArH), 6.97 (d, *J* = 7.6 Hz, 2H, ArH), 6.92 (t, *J* = 7.2 Hz, 2H, ArH), 6.88 (d, *J* = 7.6 Hz, 1H, ArH), 6.84 (d, *J* = 8.8 Hz, 1H, ArH), 6.77 (t, *J* = 7.6 Hz, 2H, ArH); <sup>31</sup>P NMR (162 MHz, CDCl<sub>3</sub>, 85% H<sub>3</sub>PO<sub>4</sub>): δ 22.898, 22.825, 22.751, 22.697; <sup>13</sup>C NMR (100 MHz, CDCl<sub>3</sub>): δ 151.4, 134.6, 134.4, 134.1, 133.9, 133.7, 133.5, 133.2, 133.1, 131.5, 131.44, 131.37, 131.35, 131.25, 129.9, 129.3, 129.04, 128.98, 128.92, 128.89, 128.87, 128.85, 128.84, 128.7, 128.64, 128.59, 128.51, 128.4, 128.3, 128.2, 127.8, 127.5, 126.81, 126.80, 126.6, 126.5, 126.47, 126.1, 126.0, 124.1, 123.4. IR (CH<sub>2</sub>Cl<sub>2</sub>): ν 3054, 1589, 1494, 1480, 1436, 1306, 1265, 1098, 1027, 819, 763, 744, 698 cm<sup>-1</sup>; MS (*m/z*): HRMS (ESI) Calcd. for C<sub>38</sub>H<sub>31</sub>AuClNP ([M+NH<sub>4</sub>]<sup>+</sup>); 764.1543. Found: 764.1532.

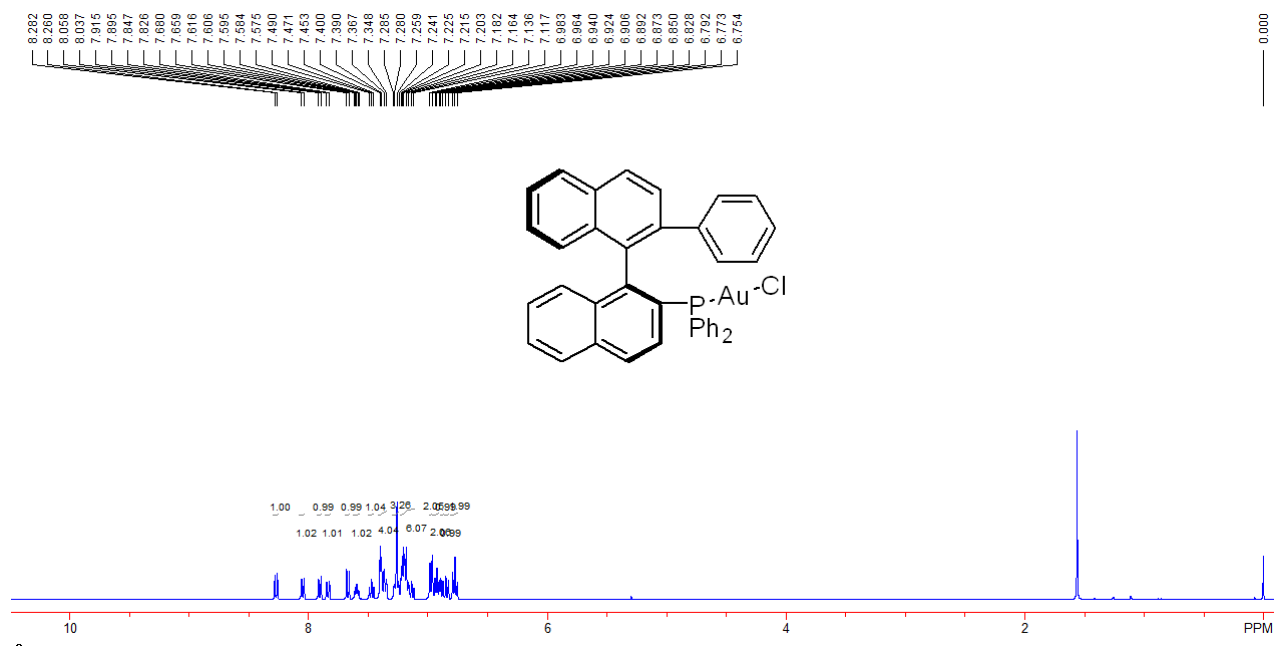

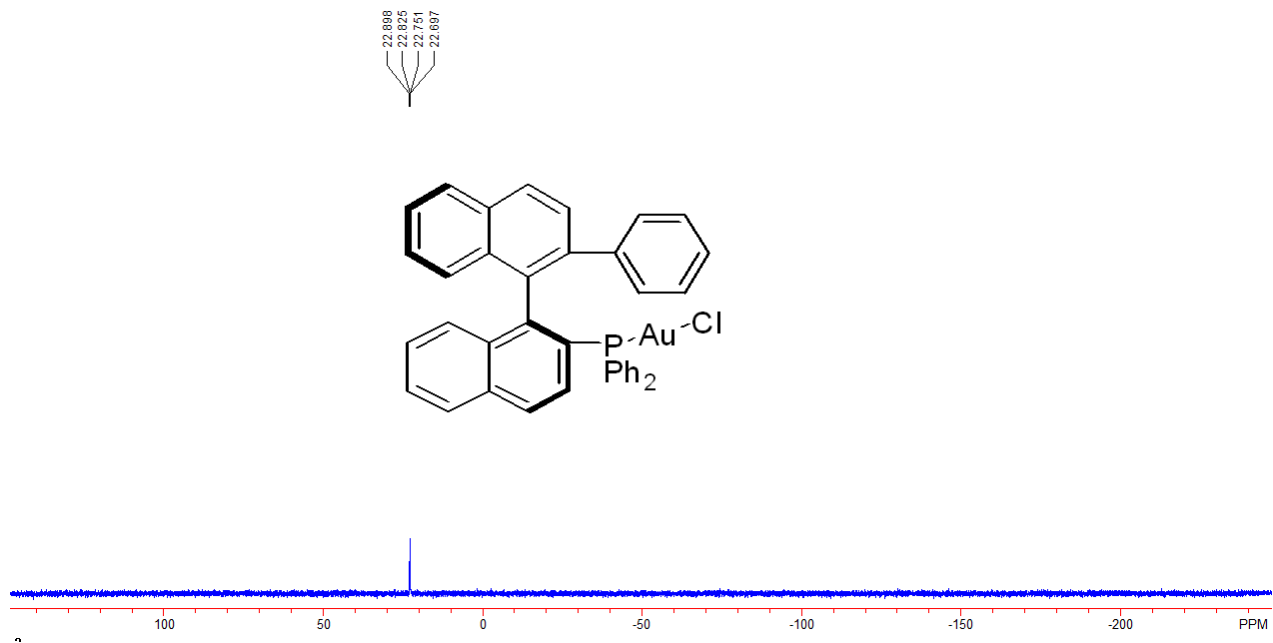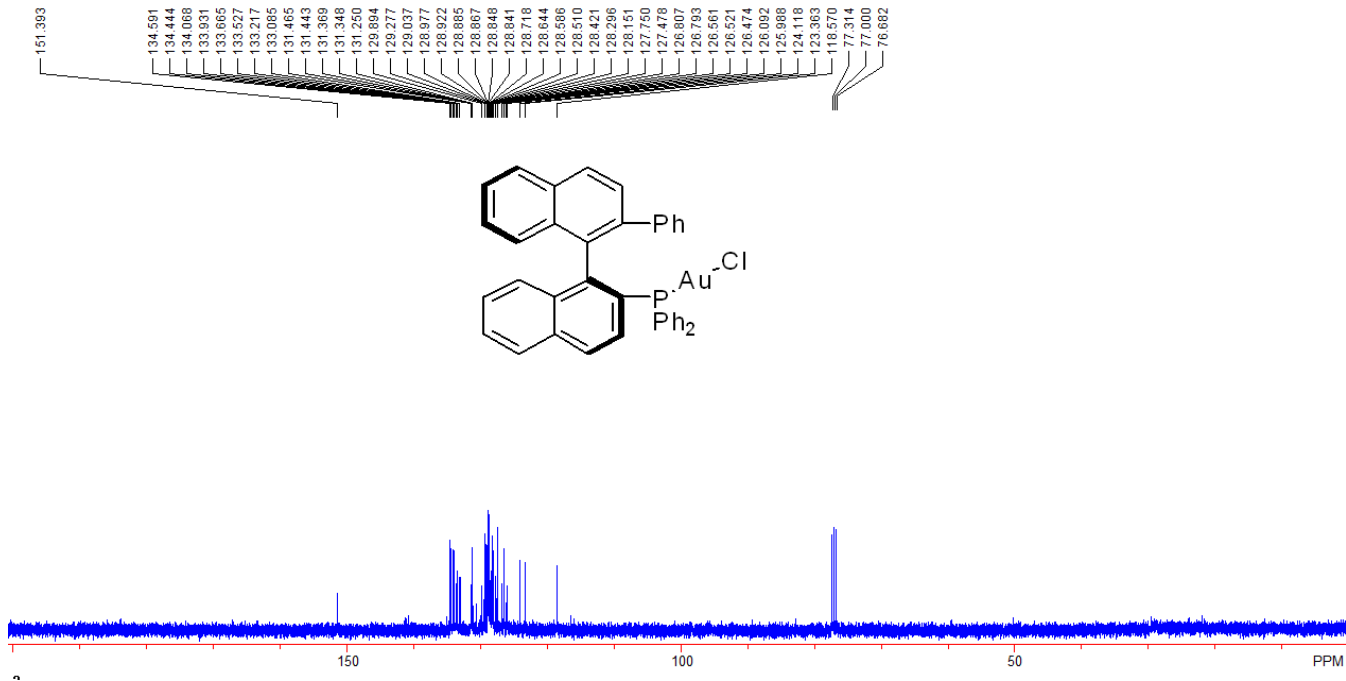



### Typical procedure for intramolecular hydroamination reaction

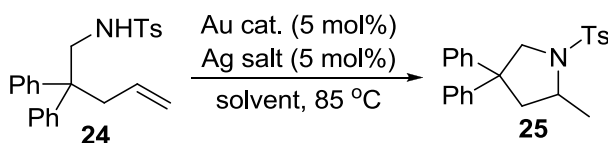

A mixture of Au catalyst (5 mol %) and AgX (5 mol %) in solvent (0.5 mL) was stirred at room temperature for 5 min under argon, then a solution of compound **24** (76.6 mg, 0.20 mmol) in solvent (0.5 mL) was added into the resulting solution. The resulting suspension was stirred at 85 °C for 36 h. Column chromatography of the reaction mixture gave the desired product. The enantiomeric purity of the product was determined by chiral HPLC analysis.

Compound **24**<sup>3</sup> was prepared according to the previously reported method.

2-methyl-4,4-diphenyl-1-tosylpyrrolidine (**25**): <sup>1</sup>H NMR (400MHz, CDCl<sub>3</sub>, TMS): δ 7.61 (d, *J* = 8.0 Hz, 2H, ArH), 7.27-7.09 (m, 12H, ArH), 4.17 (d, *J* = 10.4 Hz, 1H, CH<sub>2</sub>), 3.94 (dd, *J*<sub>1</sub> = 10.4 Hz, *J*<sub>2</sub> = 0.4 Hz, 1H, CH<sub>2</sub>), 3.82-3.74 (m, 1H, CH), 2.78 (ddd, *J*<sub>1</sub> = 12.4 Hz, *J*<sub>2</sub> = 7.2 Hz, *J*<sub>3</sub> = 0.4 Hz, 1H, CH<sub>2</sub>), 2.38 (s, 3H, CH<sub>3</sub>), 2.26 (dd, *J*<sub>1</sub> = 12.4 Hz, *J*<sub>2</sub> = 7.2 Hz, 1H, CH<sub>2</sub>), 1.25 (d, *J* = 6.4 Hz, 3H, CH<sub>3</sub>); <sup>13</sup>C NMR (100 MHz, CDCl<sub>3</sub>): δ 145.6, 144.8, 142.9, 135.3, 129.5, 128.43, 128.42, 127.1, 126.6, 126.42, 126.39, 126.2, 58.3, 55.4, 52.2, 45.9, 22.1, 21.4; [α]<sub>D</sub><sup>20</sup> 20.1 (*c* 1.2, CH<sub>2</sub>Cl<sub>2</sub>), for 29% ee; Chiralcel PA-2, hexane/*i*-PrOH = 60/40, 0.5 mL/min, 214 nm, *t*<sub>major</sub> = 45.07 min, *t*<sub>minor</sub> = 27.49 min.

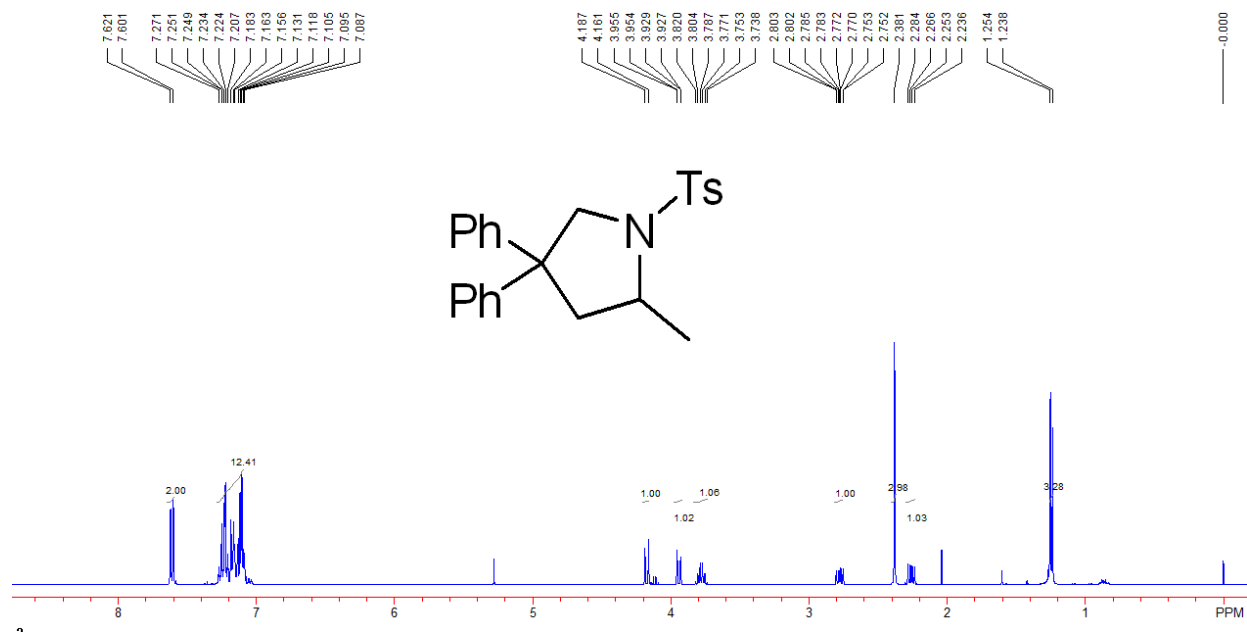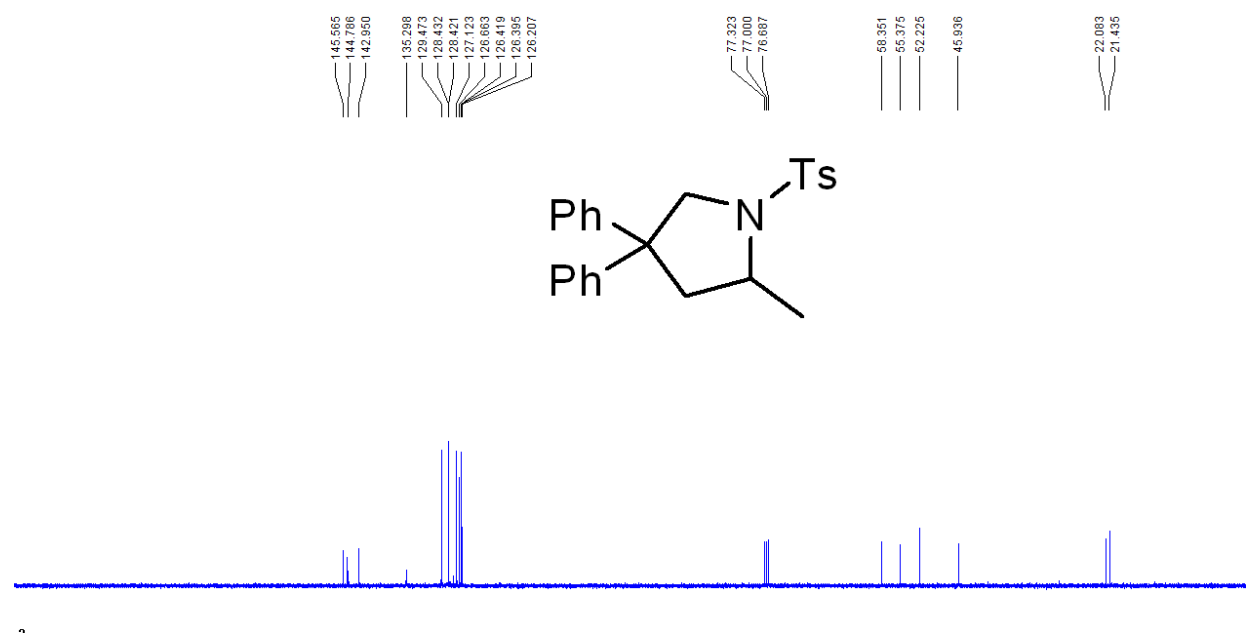

实验时间: 2013-04-13, 14:56:40  
谱图文件: C:\Users\Administrator.PC-  
20130627LMKK\Desktop\胺氢化\syw-13-12E-PA-2-6-4-0.5-214. dat

实验者:  
报告时间: 2013-06-28, 18:01:44  
积分方法: 面积归一法

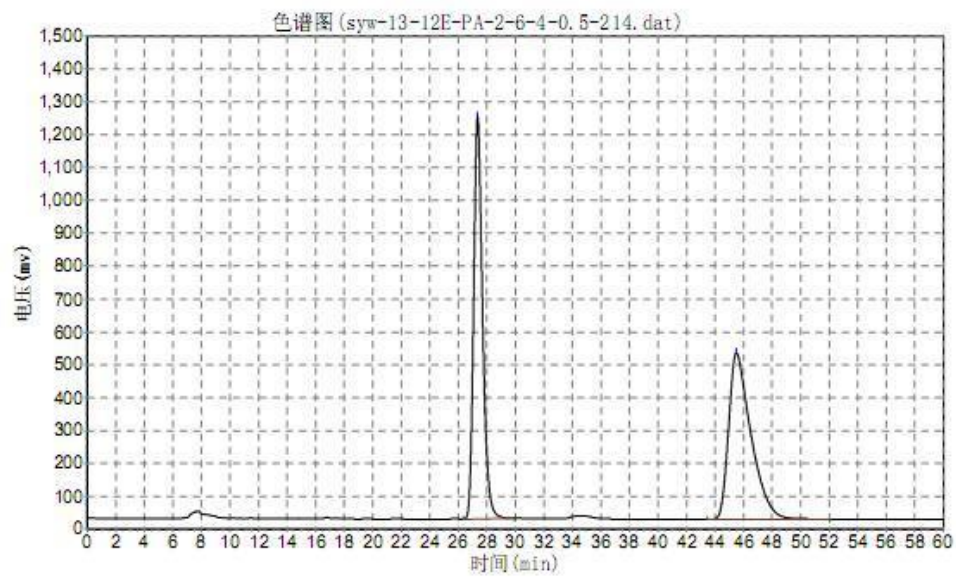

| 分析结果表 |    |        |             |               |          |
|-------|----|--------|-------------|---------------|----------|
| 峰号    | 峰名 | 保留时间   | 峰高          | 峰面积           | 含量       |
| 1     |    | 27.353 | 1223504.375 | 52971004.000  | 49.0193  |
| 2     |    | 45.495 | 507170.813  | 55090580.000  | 50.9807  |
| 总计    |    |        | 1730675.188 | 108061584.000 | 100.0000 |

Translation

| Peak No. | Peak name | Retention time | Peak height | Peak area     | Content  |
|----------|-----------|----------------|-------------|---------------|----------|
| 1        |           | 27.353         | 1223504.375 | 52971004.000  | 49.0193  |
| 2        |           | 45.495         | 507170.813  | 55090580.000  | 50.9807  |
| Total    |           |                | 1730675.188 | 108061584.000 | 100.0000 |

实验时间: 2013-04-13, 13:30:07  
谱图文件: C:\Users\Administrator.PC-  
20130627LMXX\Desktop\胺氢化\syw-13-12C-PA-2-6-4-0.5-214.org

实验者:  
报告时间: 2013-06-28, 17:02:34  
积分方法: 面积归一法

使用仪器类型: 气相色谱

检测器: FID

进样器: 分流

柱温: 程序升温

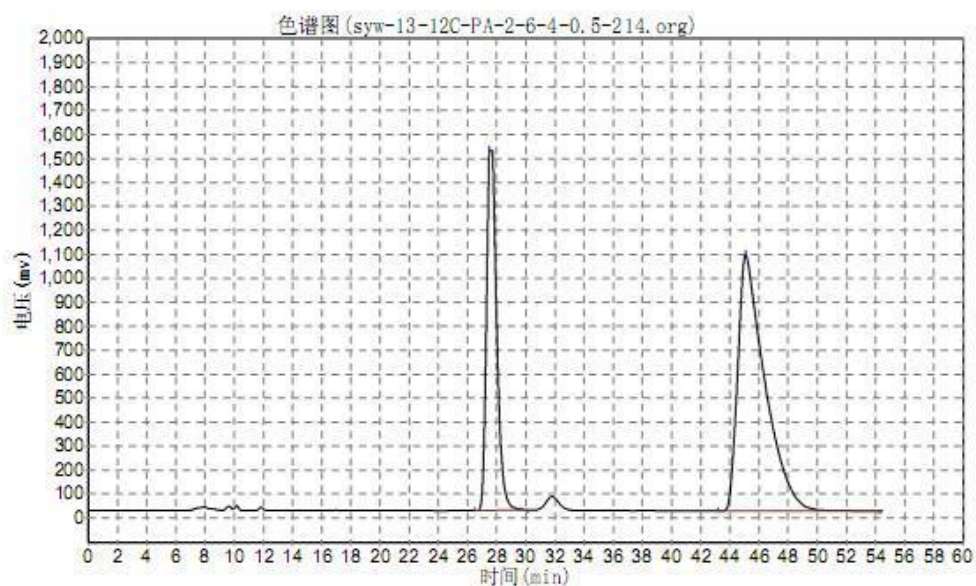

分析结果表

| 峰号 | 峰名 | 保留时间   | 峰高          | 峰面积           | 含量       |
|----|----|--------|-------------|---------------|----------|
| 1  |    | 27.495 | 1498459.875 | 73299120.000  | 34.8481  |
| 2  |    | 45.075 | 1066793.250 | 137039824.000 | 65.1519  |
| 总计 |    |        | 2565253.125 | 210338944.000 | 100.0000 |

Translation

| Peak No. | Peak name | Retention time | Peak height | Peak area     | Content  |
|----------|-----------|----------------|-------------|---------------|----------|
| 1        |           | 27.495         | 1498459.875 | 73299120.000  | 34.8481  |
| 2        |           | 45.075         | 1066793.250 | 137039824.000 | 65.1519  |
| Total    |           |                | 2565253.125 | 210338944.000 | 100.0000 |

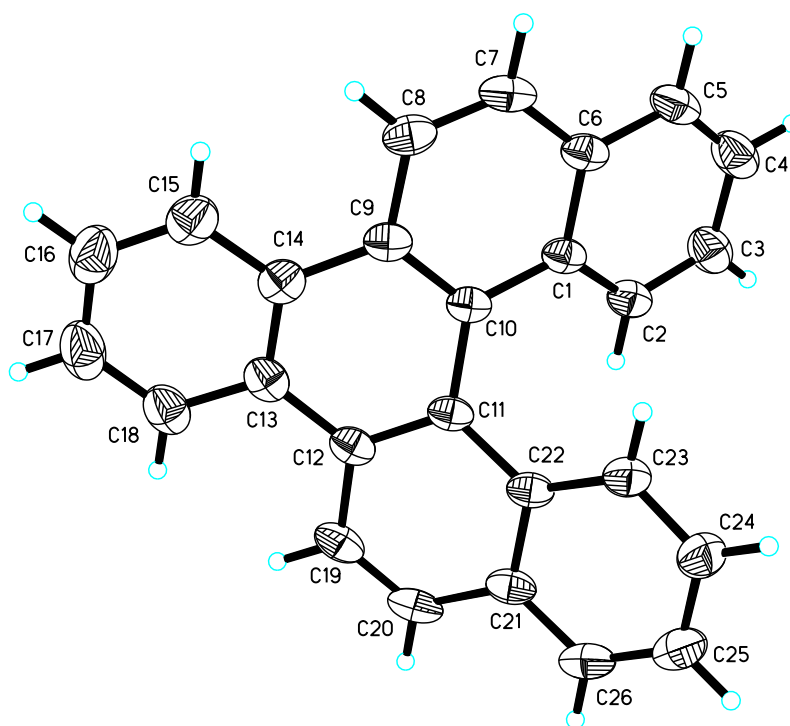

**Figure SI-1.** The crystal data of compound **23** have been deposited in CCDC with number 920618. Empirical Formula:  $C_{26}H_{16}$ ; Formula Weight: 328.39; Crystal Color, colorless; Crystal Dimensions: 0.212 x 0.156 x 0.113 mm; Crystal System: Monoclinic; Lattice Parameters:  $a = 5.8492(16)\text{\AA}$ ,  $b = 13.351(4)\text{\AA}$ ,  $c = 21.102(6)\text{\AA}$ ,  $\alpha = 90^\circ$ ,  $\beta = 91.971(5)^\circ$ ,  $\gamma = 90^\circ$ ,  $V = 1646.9(8)\text{\AA}^3$ ; Space group:  $P2(1)/n$ ;  $Z = 4$ ;  $D_{calc} = 1.324\text{ g/cm}^3$ ;  $F_{000} = 688$ ; Final R indices [ $I > 2\sigma(I)$ ]:  $R1 = 0.0678$ ;  $wR2 = 0.1630$ .

## References

1. Ooi, T.; Ohmatsu, K.; Maruoka, K. *J. Am. Chem. Soc.* **2007**, *129*, 2410-2411. doi:10.1021/ja063051q
2. Shi, M.; Chen, L.-H.; Li, C.-Q. *J. Am. Chem. Soc.* **2005**, *127*, 3790-3800. doi:10.1021/ja0447255
3. Zhang, J.; Yang, C.-G.; He, C. *J. Am. Chem. Soc.* **2006**, *128*, 1798-1799. doi:10.1021/ja053864z
